# Supplementary material for: Whole-genome sequencing identifies recurrent mutations in chronic lymphocytic leukaemia
Source: Springer Nature journal article supplement (doi:10.1038/nature10113), 2011-06-03
Supplement: 41586_2011_BFnature10113_MOESM208_ESM.pdf [file 41586_2011_BFnature10113_MOESM208_ESM.pdf]

## Patients

The clinical and biological characteristics of the four patients selected for whole-genome sequencing (WGS) are shown in Supplementary Table 1. The patients were two males and two females with age at diagnosis ranging from 42 to 59 years. In three cases, the expression of ZAP-70 and CD38 on leukaemic cells was low and in one case was high. Two patients had *IGHV*-unmutated genes, and two *IGHV*-mutated genes (<98% homology) (Supplementary Table 1). The four CLL patients lacked common 11q (*ATM*) and 17p deletions, as well as TP53 mutations because we considered that in this initial discovery phase of the project, we should try to open the study to cases with unknown mutations. The tumour samples used for WGS were obtained in an advanced stage of the disease at the time of progression but before administration of any treatment. The interval between diagnosis and preparation of tumour samples for sequencing ranged from 0.4 to 6.1 years (Supplementary Table 1). All patients gave informed consent for their participation in the study following the International Cancer Genome Consortium (ICGC) guidelines<sup>1</sup>.

## Patients and samples for mutational screening and clinical validation

To evaluate the prevalence of mutations detected in the 4 CLL cases in which we performed WGS, pairs of tumour ( $\geq 70\%$  of CLL cells) and normal DNA ( $< 5\%$  of CLL cells) (assessed by flow cytometry) were obtained from 169 CLL patients. For those mutations present in  $\geq 3\%$  of the patients of the screening series, additional cases were collected to perform clinical correlations. The tumour sample of all these cases had at least 30% of tumour cell content in the sample examined. Overall, 363 patients were included in the genomic studies and the clinical and biological data from these cases were retrieved from clinical files. The main features of these patients are summarized in Supplementary Table 10. All patients submitted to mutational screening and clinical validation gave their informed consent in agreement with an Institutional Review Board-approved informed consent for genetic studies.

## Collection and preparation of samples

The tumour samples used for WGS were obtained from cryopreserved mononuclear cells. To purify the CLL fraction, samples were incubated with a cocktail

of magnetically labelled antibodies directed against T cells, NK cells, monocytes and granulocytes (CD2, CD3, CD11b, CD14, CD15, CD56), adjusted to the percentage of each contaminating population (AutoMACS, Miltenyi Biotec). The degree of contamination by non-CLL cells in the CLL fraction was assessed by immunophenotype and flow cytometry. When the contamination by normal cells was higher than 5%, the tumour samples were subjected to an immunomagnetic purification process (AutoMACS, Miltenyi Biotec). The final tumour cell purity of the CLL1-4 samples was 98.8%, 99.5%, 99.4% and 98%, respectively, as assessed by flow cytometry. Normal blood cells of the same patients were obtained at six months (CLL1), 3 years (CLL2), 3.7 years (CLL3) and 2 years (CLL4) after the treatment was completed. No (CLL1, CLL3) or insignificant (<0.05%) (CLL2, CLL4) evidence of tumour cells was found in these normal samples by using a sensitive minimal residual disease flow cytometry assay<sup>2</sup>. Whole blood was sedimented by 2% dextran and the leukocyte fraction was obtained. DNA was extracted from purified samples by using a Qiagen kit, and the quality of purified DNA was assessed by SYBR-green staining on agarose gels and quantified using Nanodrop ND-100 spectrophotometer.

### **Library construction and sequencing**

Protocols for long and short-insert library construction and massively parallel paired-end sequencing on the Illumina/Solexa second-generation sequencing platform have been described elsewhere<sup>3</sup>. For whole-genome sequencing, at least two independent libraries per sample were constructed and sequenced with an average insert size of 400 bp. Two cases (CLL2 and CLL4) were sequenced using the Illumina GAIIx standard protocol with minor modifications, including fragmentation with a Covaris E210 instrument and pre-sizing, which results in a reduced number of chimeric reads and a tighter size distribution<sup>4</sup>; while the other two cases (CLL1 and CLL3) were sequenced using the amplification-free library protocol<sup>5</sup>, resulting in reduced bias in GC-rich regions. For mate-pair libraries, 10 µg of genomic DNA were fragmented using a hydroshear instrument (Digilab) to achieve an insert size of 2.5 Kb. Size-fractionated DNA was processed using the Illumina kit PE-112-1002, according to the manufacturer's recommendations.

## Exome-enrichment

Three  $\mu\text{g}$  of genomic DNA from each sample were sheared and used for the construction of a paired-end sequencing library as previously described in the Paired-End sequencing sample preparation protocol provided by Illumina<sup>3</sup>. Enrichment of exonic sequences was then performed for each library using the Sure Select Human All Exon Kit (Agilent Technologies) following the manufacturer's instructions. Exon-enriched DNA was pulled down by magnetic beads coated with streptavidin (Invitrogen), and was followed by washing, elution and 18 additional cycles of amplification of the captured library. Exon enrichment was validated by real-time PCR in a 7300 Real-Time PCR System (Applied Biosystems) using a set of two pairs of primers to amplify exons and one pair to amplify an intron. Enriched libraries were sequenced using two lanes of an Illumina GAIIx.

## Structural variations and DNA copy number analysis

For the detection of structural variants (SVs) we used the sequencing data from short- and long-insert libraries as previously described<sup>6</sup>, as well as the information from three different genotyping platforms.

**Computational analysis of SVs.** To identify SVs we used a pipeline named PeSVFisher (Escaramis *et al.*, manuscript in preparation). A workflow describing all the process is shown in Supplementary Fig. 9. Briefly, this pipeline consists of five steps that lead to the identification of four different categories of SVs (deletions, insertions, inversions and translocations):

- First, from each BAM file, read-pairs corresponding to a single paired-end or mate-pair library are extracted using SAMtools. Unpaired reads and unmapped read-pairs are pulled out taking advantage of the flag field.

- Second, reads are assigned to three different files based on the following criteria: (1) read-pairs mapped in right order and right orientation, (2) read-pairs mapped in right order but wrong orientation (i.e., both reads mapped in either forward or reverse strands), (3) read-pairs mapped in different chromosomes. In this step, we discard read-pairs matching regions in the reference genome with a phred-based quality score lower than 30 at either end. This will ensure a mapping accuracy of at least 99.9%.

- Third, file (1) is used to construct the empirical distribution of the insert size ( $L$ ). This will help to define cut-offs to discriminate concordant read-pairs (those falling into

the expected range) from discordant read-pairs. An upper cut-off (UC) and a lower cut-off (LC) are calculated as the 0.995 and 0.005 percentiles of the L distribution.

- Fourth, a clustering procedure is carried out to group indicators pointing to the same SV category. This clustering algorithm is based on Mario Cáceres approach to detect genomic inversions (Martinez *et al.*, in preparation) which we have adapted to call further types of SVs. The algorithm is based on geometrical rules in addition to the following conventional criteria: (i) Putative deletions are derived from overlapping read-pairs with insert sizes larger than UC. (ii) Putative insertions are derived from overlapping read-pairs with insert sizes smaller than LC. (iii) Putative inversions are derived from overlapping read-pairs mapped into the same strand. (iv) Putative translocations are derived from overlapping read-pairs mapped onto the same strands and chromosomes. In all four cases, any read-pair that has been included in one cluster is not considered for any other cluster.

- Fifth, predictions of presumed SVs are computed from each cluster that contains at least two read-pairs. Breakpoints are predicted as an interval where the actual breakpoint can occur. Two breakpoints are considered for the case of deletions, inversions and translocations, whereas a single point is predicted for the case of insertions.

***Somatic SVs identification.*** To find out somatic SVs, we extracted those variants that involved genes present in the cluster files of tumour samples with at least 4 read-pairs and found in the normal samples with at most 2 read-pairs. The stringency of the analysis eliminated those structural variants that contained repeat sequences and segmental duplications. It is likely that this stringent approach may lead to the loss of several structural variants potentially associated with the evolution of CLL. The full characterisation of the multiple additional changes and the variability of SV associated with CLL will be further investigated in a follow-up study.

***Agilent 1M arrays.*** Tumour and normal DNA (1 µg) from the same patient were fluorescently labelled and hybridized according to the manufacturer's protocol. After hybridization to an Agilent 1M array, slides were washed and fluorescence was assessed using an Agilent microarray scanner G2565CA (Agilent Technologies). Raw data were generated from scanned images using Agilent Feature Extraction Software (v10.7). Log<sub>2</sub>ratios of background corrected values for tumour over normal DNA were calculated. Normalization was carried out on Agilent's CGH Analytics, integrated on the Genomic Workbench suite (v5.0), using data from the internal set of control probes

included in the microarray. Detection of Copy Number Alterations (CNAs) was performed using the ADM-2 algorithm, also implemented within the Agilent's genomics suite Genomic Workbench v5.0, with a threshold of 6.5 and a minimum of 5 consecutive probes. Post-hybridization quality control reports included DLRspread values, signal intensity, background intensity in each channel, signal-to-noise ratio, and reproducibility. Any array with DLRspread over 0.3 was considered as low quality and consequently discarded. Array CGH analysis was outsourced to qGenomics ([www.qgenomics.com/](http://www.qgenomics.com/)).

**Affymetrix SNP6.0 arrays.** Tumour and normal DNA (500 ng) were digested with *NspI* and *StyI* restriction enzymes and processed according to standard protocols for Affymetrix Genome-Wide Human SNP 6.0 microarrays. Arrays were washed using Affymetrix fluidics station and scanned with the Gene Chip Scanner 3000. Image data were analysed with Genotyping Console 4.0 to obtain the CEL data files, which were also exported to the Partek Genomic Suite (Partek Inc.) for data analysis and visualization. Quality controls assessed by Genotyping Console included Contrast Quality Control (CQC>0.4) produced by Birdseed and Median of the Absolute values of all Pairwise Differences (MAPD<0.35). Tumour and normal DNA samples were analysed individually with the Genotyping Console 4.0 using regional GC correction and segment reporting tool filters: minimum of 5 markers per segment and 100 Kb minimum genomic size of a segment, as well as by visual inspection. Paired analysis using constitutional DNA was obtained by the Partek software package in order to exclude inherited copy number variants (CNV). CNAs were scored with a Hidden Markov Model (HMM) and the segmentation method included in Partek's Suite. *Affymetrix SNP6.0* genotyping was outsourced to CeGen ([www.cegen.org](http://www.cegen.org)).

**Illumina HumanOmni1-Quad arrays.** Tumour and normal DNA samples (200 ng) were genotyped using Illumina HumanOmni1-Quad Beadchips following the manufacturer's standard recommendations. Illumina's BeadArray Reader was used to analyse fluorescence signals from each BeadChip. The fluorescence intensities analysis and decoding of SNP position were performed using Illumina's BeadScan software. Genotype calling was performed with GenomeStudio software (v2010.1) using the standard cluster file provided by Illumina (HumanOmni1-Quad\_v1-0\_B.egt). The GenCall score cut-off was 0.15. All samples passed Illumina internal controls. Normalized total signal intensity ratios (LRR) as well as normalized allelic intensity ratios (BAF) were also obtained from GenomeStudio software to further call CNVs.

CNV calls of tumour and normal DNA samples individually was performed with the PennCnv program using a wave adjustment procedure for genomic waves via the `gmodel` argument and a filter of 5 markers per segment. Paired analysis was performed based on the ratio of tumour LRR values to normal LRR values. CNAs were then obtained using GADA package within R environment using the recommended settings. *Illumina HumanOmni1-Quad* genotyping was outsourced to CeGen ([www.cegen.org](http://www.cegen.org)).

### Mapping and initial base calls

Reads from each library were mapped to the human reference genome (GRCh37) using BWA<sup>7</sup> with the `sampe` option, and a BAM file was generated using SAMtools<sup>8</sup>. Reads from the same paired-end libraries were merged, and optical or PCR duplicates were removed using Picard (<http://picard.sourceforge.net/index.shtml>). Finally, all BAM files from the same sample were merged using Picard. Bases were initially called using the Maq consensus model implemented in SAMtools. Statistics about the number of mapped reads, genome physical coverage and depth of coverage for each sample are shown in Supplementary Tables 2, 3 and 4.

### Identification of somatic substitutions

To determine the base calling accuracy, we used the genotyping information from two independent genotyping platforms performed on the same samples used for WGS, Affymetrix 6.0 and Illumina OmniQuad, using a similar approach as that described for AML<sup>9</sup>. These platforms have 275,976 SNPs in common, and 275,012 of them were also present in the whole-genome data, resulting in an estimated coverage of 99.65%. Both platforms have the same call in 269,240 out of 270,367 positions common to them and whole-genome data (99.58% agreement between both platforms). Those positions with the same call in both platforms were called hqSNPs and used to determine the calling accuracy from whole-genome data. We found that 99.78% of the hqSNPs were called correctly by SAMtools (268,653 out of 269,240), and 99.37% of heterozygous hqSNPs were identified (78,594 out of 79,093), suggesting that both the coverage and calling accuracy was sufficient to identify somatic mutations present in heterozygosis. We estimated the false discovery rate to be about 0.02%. To identify somatic mutations we developed a mutation caller named *Sidrón* (Quesada *et al.*, to be published elsewhere),

which uses a binomial probabilistic model similar to other mutation callers recently described<sup>10</sup>. Basically, for every single variant base initially identified in the tumour genome the program calculates a probability for that base not being a reference base for both tumour and normal DNA, taking into account the number of reads supporting the variant and the base quality. Then, genotyping information for each sample is used to define thresholds for calling non-reference bases in the tumour and in the normal. Those bases considered non-reference in the tumour and reference in the normal DNA are considered somatic mutations. The procedure is detailed below. The program consists of five steps that lead to the identification of somatic mutations:

- First, the information from the hqSNPs is used to calibrate the sequencing error. Briefly, in a homozygous hqSNP, discordant bases identified in the pileup are likely due to sequencing artifacts. Thus, homozygous hqSNPs are used to compute the probability of getting a nucleotide read  $N_{\text{read}}$  if the read base quality is  $Q$  and the real genomic base is  $N_{\text{ref}}$  ( $p(N_{\text{read}} | N_{\text{ref}}, Q)$ ).

- Second, the information from the heterozygous hqSNPs is used to determine the minimum and maximum coverage, as well as minimum mapping quality and SNP quality to identify >99% of all heterozygous hqSNPs, and these settings are applied to the whole tumour pileup.

- Third, for every variant base in the tumour genome, *Sidrón* computes the probability of getting the corresponding pileup line ( $C$ ) given two possible genotypes: homozygous for the most frequent base ( $H_z$ ) and heterozygous with the most frequent and second most frequent bases ( $H_{et}$ ). The output is the score  $S$ :

$$S = \log \left[ \frac{p(C | H_{et})}{p(C | H_z)} \right]$$

This score is calculated in each variant position for the corresponding tumour and normal pileup lines using the values of  $p(N_{\text{read}} | N_{\text{ref}}, Q)$  obtained for each one in the first step.

- Fourth, genotypes are called based on  $S$ , with cut-off values determined empirically from hqSNPs and validation data. We found optimal sensitivity and specificity by calling  $H_{et}$  with  $S > 14$  and  $H_z$  with  $S < -4$  in high coverage positions ( $> 20$ ) and  $H_{et}$  with  $S > 8$ ,  $H_z$  with  $S < -2$  otherwise. Borderline variants were manually inspected.

- Fifth, candidate somatic mutations are subjected to quality controls to filter out those owing to common sequencing and alignment artefacts by inspecting the reads supporting them. Thus, reads that supported a mutation by showing a novel stretch of more than ten consecutive identical nucleotides were not considered. Reads that could be better aligned to different sites in the genome were also eliminated. Reads present in repetitive regions of the genome were discarded. Finally, mutations unevenly distributed in the supporting reads were mostly due to the presence of small indels, and were filtered out.

We classified the somatic mutations into three different classes according to their potential functional effect: class 1, non-synonymous changes, indels causing frameshifts in coding regions and mutations affecting critical splicing sites; class 2, synonymous mutations and those located in untranslated regions (UTRs); and class 3, comprising all remaining mutations.

We were able to validate more than 96% (83 out of 86) of the identified class 1 and 2 variants for which PCR and capillary sequencing was obtained. Capillary sequencing of 384 random mutations (96 per case) revealed that more than 96% of them were true somatic mutations. In addition, the use of a combined strategy of WGS and exome sequencing was helpful to try to determine the sensitivity of this analysis, as the high depth of coverage in exome sequencing simplifies the identification of variants which might be difficult to detect at lower coverage. Using the WGS data we were able to identify 37 of the 42 somatic mutations detected and validated by exome sequencing, suggesting that the sensitivity of our method is around 88%, although the reduced number of mutations per tumor makes difficult to precisely estimate this parameter.

### **Somatic mutation identification in pooled samples (SMIPS)**

To discover recurrent somatic mutations in CLL, we performed a screening of somatic mutations in a set of 169 additional CLL cases using a combination of pooled samples, PCR amplification and high-throughput sequencing. Expressed genes with class 1 somatic mutations detected and validated in one CLL sample using either whole-genome or exome sequencing were considered as candidates for driver mutations. We used a modified method for the analysis of pooled samples<sup>11</sup>. First, we pooled a normalized amount of genomic DNA from normal and tumour samples of CLL patients.



Then, we amplified exons of interest and pooled them again to be sequenced using Illumina Genome Analyzer. Genomic DNAs were quantified by Quant-iT dsDNA Broad Range assay (Invitrogen) and Nanodrop ND-1000 spectrophotometer. Two pools were made with either 88 cases (1100 ng per individual – Pool 1) or 84 cases (630 ng per individual – Pool 2), including three of the cases subjected to WGS. Normal and tumour samples were pooled separately in 4 different pools (1N, 1T, 2N and 2T). Final concentrations for these pools were 70.3 ng/ $\mu$ L (Pool 1N), 70.6 ng/ $\mu$ L (Pool 1T), 49.9 ng/ $\mu$ L (Pool 2N) and 48.8 ng/ $\mu$ L (Pool 2T).

PCR primers (Supplementary Table 11) were designed using Primer 3 (<http://frodo.wi.mit.edu/primer3>), and purchased from Sigma-Aldrich. PCR reactions were performed to amplify 200 amplicons, including 236 exons and spanning a total of 103,940 bp in each of four genomic DNA pools. These PCRs and subsequent pooling and sequencing were made in 3 different rounds of validation corresponding roughly to 80 amplicons and 40 Kb per round. Each target locus was amplified using 50 ng from each pooled DNA, corresponding to approximately 100 diploid genomes per case. Amplification was performed using Platinum Pfx DNA Polymerase (Invitrogen), and the reaction mix contained 1X final concentration of 10X Pfx Amplification Buffer (Invitrogen), 300  $\mu$ M dNTPs (Invitrogen), 300 nM forward primer, 300 nM reverse primer, 1 mM MgSO<sub>4</sub> and 1 unit Platinum Pfx DNA polymerase in a final reaction volume of 50  $\mu$ L. PCR conditions were 1 cycle of 2 min at 94 °C, followed by 35 cycles of 15 sec at 94 °C, 30 sec at 60 °C, and 30-60 sec (depending on amplicon length, 60 sec if larger than 500 bp) at 68 °C. If amplification failed, PCR was repeated with 2X final concentration of 10X Pfx Amplification Buffer or using Expand Long Polymerase (Roche). PCR products were then purified using QIAquick PCR Purification Kit (QIAGEN) and quantified using Nanodrop ND-1000 spectrophotometer.

From each pool, equimolecular amounts ( $40 \times 10^{10}$  molecules) of each amplicon were pooled. Then, random ligation of amplicons was performed in order to obtain concatemers using 1X T4 DNA Ligase Buffer (New England Biolabs), 2400 units of T4 DNA ligase (New England Biolabs), 120 units T4 polynucleotide kinase (New England Biolabs), 15% (wt/vol) polyethylene glycol 8000 MW (Sigma-Aldrich-Fluka). The final volume was divided into four parts and incubated at 22 °C for 17 h, followed by incubation at 65 °C for 20 min. Agarose gel electrophoresis was performed with 1  $\mu$ L of ligated and non-ligated pools to confirm the concatenation of amplicons. To remove

polyethylene glycol, we sedimented the ligated pools in a microcentrifuge at 15,000 x g and room temperature for 30 min in the presence of 10 mM MgCl<sub>2</sub> as previously described<sup>12</sup>. Pellets were washed twice with 70% ethanol followed by centrifugation to remove the ethanol. Once dried, DNA was dissolved in 50 µL of TE and quantified. Three µg of each pool were individually sonicated in 6 x 16 mm round bottom glass microtubes (Covaris) using the Covaris S2 sonicator (200 Cycles, Duty Cycle 10%, intensity 5 and 360 sec) (Covaris). Fragmentations were confirmed by Bioanalyzer 2100 (Agilent Technologies), and DNA libraries were prepared as previously described following the Paired-End sample preparation protocol from Illumina.

### **Analysis of SMIPS data**

Reads were mapped to the reference genome with BWA using the same procedure as outlined above, but omitting the removal of PCR duplicates. The coverage per base was between 50,000-80,000X. A pileup file was generated with SAMtools, and only those bases with base quality  $\geq 30$  were used for the analysis. Due to the high depth of coverage, errors in the sequencing or introduced by the DNA polymerase during PCR amplification or library construction can be detected using this approach. In the PCR reaction for each amplicon, we used about 570 pg of DNA per case, which represents more than 100 diploid genomes for that particular patient. In the case that a mutation is introduced by the DNA polymerase during PCR, that mutation would be present in 1 out of 200 allele copies for that patient, or 1 out of >17,000 copies for the whole pool. However, a real mutation in heterozygosity would be present in about 100 of the 200 copies for that patient, or in 1 of the ~174 alleles present in the pool. Therefore, it would be possible to discriminate between real variants and PCR or sequencing errors as real variants should be supported by approximately one allele in the whole pool. To confirm that this method is able to estimate the correct number of alleles for a variant, we calculated the allele frequency for those SNPs present in our sample, with corresponding entries in dbSNP131, and for which the frequency in the Central European (CEU) population was known. We then compared the estimated allele frequency obtained from our analysis of 169 cases with those reported for the CEU population for 72 SNPs (Supplementary Fig. 10). We obtained a correlation coefficient  $r^2=0.974$  between both datasets, suggesting that using this method we are able to

correctly estimate the number of alleles with a certain variant present in the pooled sample.

To identify somatic substitutions, we extracted those variants present in the pool of tumour DNAs with an allele frequency estimation of more than 0.5, and for which there were less than 0.2 alleles in the pool of normal DNAs. We selected these cut-offs because the tumour DNAs included in the pool had some degree of normal cell contamination (up to 30%), and normal DNA was obtained from peripheral blood leukocytes and it was required to have less than 5% contamination with tumour cells. In most cases some tumour cell contamination below this limit was present in the normal sample. Using these cut-offs, we were able to identify all somatic substitutions analysed and present in cases CLL1, CLL3 and CLL4, which had been included in the pool as positive controls, demonstrating the sensitivity of the analysis. We detected germline or somatic variants with high sensitivity (up to one mutant allele in a pool of 182 alleles and >93% of the somatic mutations from the three cases included as positive controls) and high specificity (>82% of mutations detected by SMIPS were validated as somatic by Sanger sequencing in tumour and normal DNA).

The identification of small indels in pooled samples with very high depth of coverage but present in a small fraction of alleles is challenging. We took advantage of the extended CIGAR field present in the BAM format<sup>8</sup>, as this annotation reveals the presence of an indel in an individual read. We used custom scripts to process the CIGAR fields and compare the frequency of insertions and deletions between tumour and normal pools at each analysed position. We were able to correctly identify the somatic deletions present in *CD8A* and *NOTCH1*, although no additional indels were detected in any of the analysed genes.

### Gene expression analysis

Total RNA was extracted with the TRIzol reagent following the recommendations of the manufacturer (Invitrogen Life Technologies). RNA integrity was examined with the Agilent 2100 Bioanalyzer (Agilent Technologies) and only high quality RNA samples were hybridized to Affymetrix GeneChip Human Genome U133 plus 2.0 arrays, according to Affymetrix standard protocols. The analysis of the scanned images and the determination of the detection call for each probe set of the array were obtained with the GeneChip Operating Software (GCOS, Affymetrix). Summarized expression values were computed using the robust multichip average (RMA) approach

implemented in the Expression Console software (Affymetrix). The supervised analysis was performed with the BRB-Array Tools, v.3.6.0 software. Previous to the supervised analysis of CLL samples, we selected the probe sets that were present in at least 10% of the cases (n=31,989). The differential gene expression analysis was performed using the Significance Analysis of Microarrays Data (SAM) method implemented in BRB-Array Tools. The level of significance to detect differentially expressed genes was a 90<sup>th</sup> percentile False Discovery Rate (FDR) <0.05. To identify potential KEGG pathways (<http://www.genome.jp/kegg/pathway.html>) that could show a differential expression between *NOTCH1*-mutated and -unmutated CLL cases, we performed a gene set analysis applying three different tests, LS permutation test, Efron-Tibshirani's GSA maxmean test, and Goeman's global test, as implemented in BRB-Array Tools. To reduce multiple probe sets to one per gene symbol, the different probe sets for a gene were collapsed into a single vector of values using the most variable probe set measured by the interquartile range across arrays reducing the list to 13,239 genes. The pathways that were significant at level  $P < 0.02$  in the three enrichment tests performed were considered to be differentially expressed between classes. A t-test was performed to identify the genes included in the NOTCH1 pathway from KEGG that had a differential expression between *NOTCH1*-mutated and -unmutated tumours.

### Immunoprecipitation and Western blotting

Tumour cells were lysed for 30 min in Triton buffer (1% Triton X-100, 50 mM Tris-HCl pH 7.6, 150 mM NaCl, 1 mM EDTA) supplemented with protease and phosphatase inhibitors (1 mM PMSF, 2 mM sodium pyrophosphate, 2 mM sodium beta-glycerophosphate, 1 mM sodium fluoride, 1 mM sodium orthovanadate, 10 µg/mL leupeptin and 10 µg/mL aprotinin). For the detection of phospho-STAT3, cells were lysed in CHAPS buffer (1% CHAPS, 100 mM NaCl, 5 mM Na<sub>2</sub>HPO<sub>4</sub> and 2.5 mM EDTA). Lysates were cleared by centrifugation at 15,000 x g at 4 °C for 15 min, and protein concentrations were determined using the Bradford method. Fifty µg of protein were separated by SDS-polyacrylamide gel electrophoresis and transferred onto Immobilon-P membranes. Proteins were detected by using the following antibodies: anti-NOTCH1 (D1E11), cleaved NOTCH1 (Val1744) (D3B8), anti-IRAK1 (D51G7), anti-MyD88 (D80F5), anti-phospho-IκBα, anti-phospho-STAT3 (Tyr705) (D3A7), anti-STAT3 (79D7) (Cell Signaling Technology), anti-phospho-p65 (Ser536), anti-

cyclin D2 (M-20) (Santa Cruz Biotechnology) and anti-I $\kappa$ B $\alpha$  (Merck, Calbiochem). Antibody binding was detected using horseradish peroxidase-labelled anti-mouse (Sigma) or anti-rabbit (Cell Signalling Technology) antibodies and chemiluminescence was detected using a LAS4000 device (Fuji). Equal protein loading was confirmed with antibodies against  $\beta$ -actin or  $\alpha$ -tubulin (Sigma). For MyD88 immunoprecipitation, CHAPS buffer was used (1% CHAPS, 100 mM NaCl, 5 mM Na<sub>2</sub>HPO<sub>4</sub> and 2.5 mM EDTA) supplemented with protease and phosphatase inhibitors. Protein extracts were incubated overnight at 4 °C with an anti-MyD88 antibody (D80F5) and then, protein-A beads were added for one additional hour. Supernatant (nonimmunoprecipitated fraction) was recovered by centrifugation, and protein-A beads (immunoprecipitated fraction) were washed three times with CHAPS buffer.

### **NF- $\kappa$ B p65 DNA-binding analysis**

Nuclear extracts were obtained from primary CLL cells and assayed for NF- $\kappa$ B p65 activity using the TransAM NF- $\kappa$ B Chemiluminescence kit (Active Motif). Two micrograms of nuclear extracts were incubated according to the manufacturer's protocol into 96-well plate coated with an oligonucleotide containing the NF- $\kappa$ B consensus DNA-binding site (ELISA-based method). DNA binding was detected by incubating with an antibody against p65 followed by a horseradish peroxidase conjugated secondary antibody. The acquisition and the quantification of the signal were done on a LAS4000 device as above.

### **TLR stimulation assay**

A TLR stimulation assay was performed using tumour cells from either two patients with the L265P *MYD88* mutation, or from four patients with wild type *MYD88*, and purified B-lymphocytes from two patients with the previously reported inactivating *MYD88* mutation E52DEL<sup>13</sup>. All the samples contained more than 95% B-lymphocytes and they were cultured in Ex-vivo 15 medium (Lonza) for 48 h with TLR agonists or IL-1beta (IL-1 $\beta$  10 ng/ml, R&D Systems Europe), as previously described<sup>14</sup>. TLR agonists were Pam3CSK4 1  $\mu$ g/mL for TLR1/2, HKLM 10<sup>8</sup> cells/mL for TLR2, poly(I:C) LMW 10  $\mu$ g/mL for TLR3, *Escherichia coli* K12 LPS 1  $\mu$ g/mL for TLR4, *Salmonella typhimurium* flagellin 1  $\mu$ g/mL for TLR5, FSL1 1  $\mu$ g/mL for TLR6/2,

Imiquimod 1 µg/mL for TLR7, ssRNA40 1µg/mL for TLR8, and ODN2006 5 µM for TLR9. These TLR agonists were from Human TLR1-9 Agonist Kit™ (InvivoGen). For all incubations except that with LPS, cells were first incubated with 10 µg/mL of polymyxin B (Sigma, P-4932) for 20 min. *In vivo* cytokine production was assessed in tissue culture supernatants using fluorescence-activated cell sorter analysis (Luminex 100 System) Cytokine Human 25-plex panel (Invitrogen), a multiplexed sandwich immunoassays based on flow-cytometry Luminex technology, was used to measure 25 cytokines (IL-1β, IL-1RA, IL-2, IL-2R, IL-4, IL-5, IL-6, IL-7, IL-10, IL-12 (p40), IL-13, IL-15, IL-17, TNF-α, IFN-α, IFN-γ, GM-CSF, MIG, CXCL8/IL-8, CXCL10/IP-10, CCL2/MCP-1 CCL3/MIP-1α, CCL4/MIP-1β, CCL5/RANTES and CCL11/Eotaxin). Data were analysed with the Luminex software.

### Statistical analysis

The SPSS Statistics 17.0 (SPSS Inc) package was employed to correlate clinical and biological variables by means of Fisher's test or non-parametric test when necessary. Survival curves were analysed according to the Kaplan and Meier method and compared using the log-rank test<sup>15</sup>. In a Cox regression analysis comparing *NOTCH1* mutations and transformation to DLBCL only the later ( $P < 0.001$ ) maintained its prognostic impact on overall survival, suggesting that the adverse survival impact of *NOTCH1* mutation in CLL may be due in part to the higher risk of transformation into DLBCL. All statistical tests were two-sided and the level of statistical significance was 0.05.

### References

1. Hudson, T. J. *et al.* International network of cancer genome projects. *Nature* **464**, 993-998 (2010).
2. Rawstron, A. C. *et al.* International standardized approach for flow cytometric residual disease monitoring in chronic lymphocytic leukaemia. *Leukemia* **21**, 956-964 (2007).
3. Bentley, D. R. *et al.* Accurate whole human genome sequencing using reversible terminator chemistry. *Nature* **456**, 53-59 (2008).
4. Quail, M. A. *et al.* A large genome center's improvements to the Illumina sequencing system. *Nat Methods* **5**, 1005-1010 (2008).
5. Kozarewa, I. *et al.* Amplification-free Illumina sequencing-library preparation facilitates improved mapping and assembly of (G+C)-biased genomes. *Nat Methods* **6**, 291-295 (2009).
6. Campbell, P. J. *et al.* The patterns and dynamics of genomic instability in metastatic pancreatic cancer. *Nature* **467**, 1109-1113 (2010).
7. Li, H. & Durbin, R. Fast and accurate short read alignment with Burrows-Wheeler transform. *Bioinformatics* **25**, 1754-1760 (2009).

8. Li, H. *et al.* The Sequence Alignment/Map format and SAMtools. *Bioinformatics* **25**, 2078-2079 (2009).
9. Ley, T. J. *et al.* DNA sequencing of a cytogenetically normal acute myeloid leukaemia genome. *Nature* **456**, 66-72 (2008).
10. Goya, R. *et al.* SNVMix: predicting single nucleotide variants from next-generation sequencing of tumors. *Bioinformatics* **26**, 730-736 (2010).
11. Druley, T. E. *et al.* Quantification of rare allelic variants from pooled genomic DNA. *Nat Methods* **6**, 263-265 (2009).
12. Paithankar, K. R. & Prasad, K. S. Precipitation of DNA by polyethylene glycol and ethanol. *Nucleic Acids Res* **19**, 1346 (1991).
13. von Bernuth, H. *et al.* Pyogenic bacterial infections in humans with MyD88 deficiency. *Science* **321**, 691-696 (2008).
14. von Bernuth, H. *et al.* A fast procedure for the detection of defects in Toll-like receptor signaling. *Pediatrics* **118**, 2498-2503 (2006).
15. Peto, R. & Pike, M. C. Conservatism of the approximation  $\sigma(O-E)^2/E$  in the logrank test for survival data or tumor incidence data. *Biometrics* **29**, 579-584 (1973).

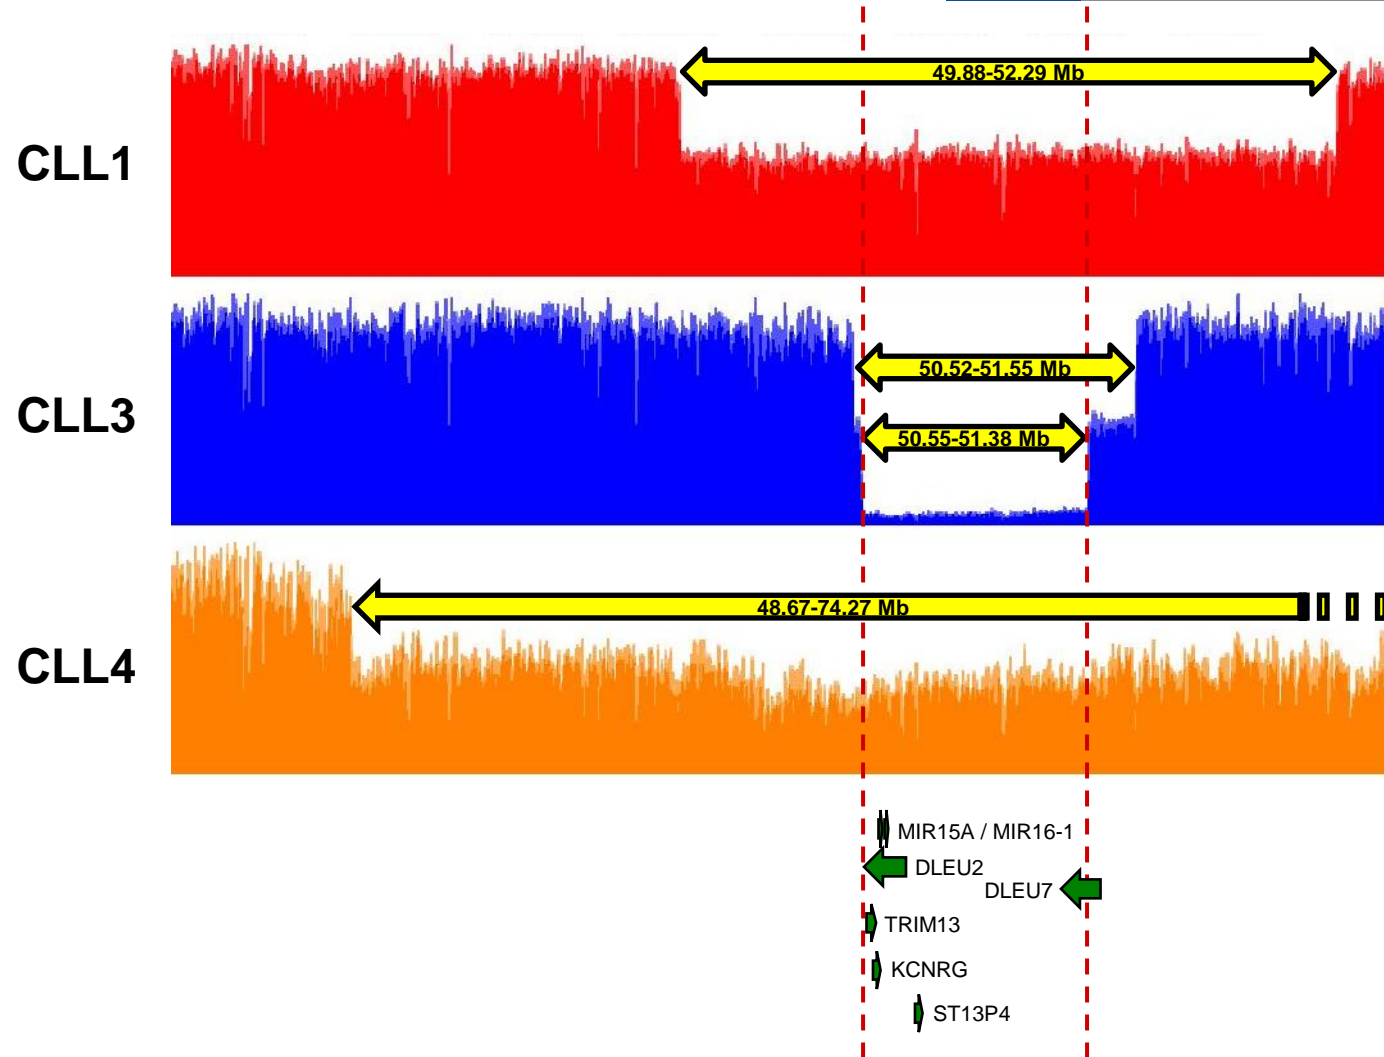

**Supplementary Figure 1.** Identification of recurrent deletions of chromosome 13q in cases CLL1, CLL3 and CLL4. WGS coverage with local regression smoothing of region 48 Mb to 52.5 Mb. Yellow arrows indicate the deleted region and the chromosomal breakpoints. For case CLL3, two independent deletion events are shown, and the corresponding breakpoints are also indicated. Dashed lines represent the minimum common region deleted in the three cases. Genes present in this region are shown at the bottom.



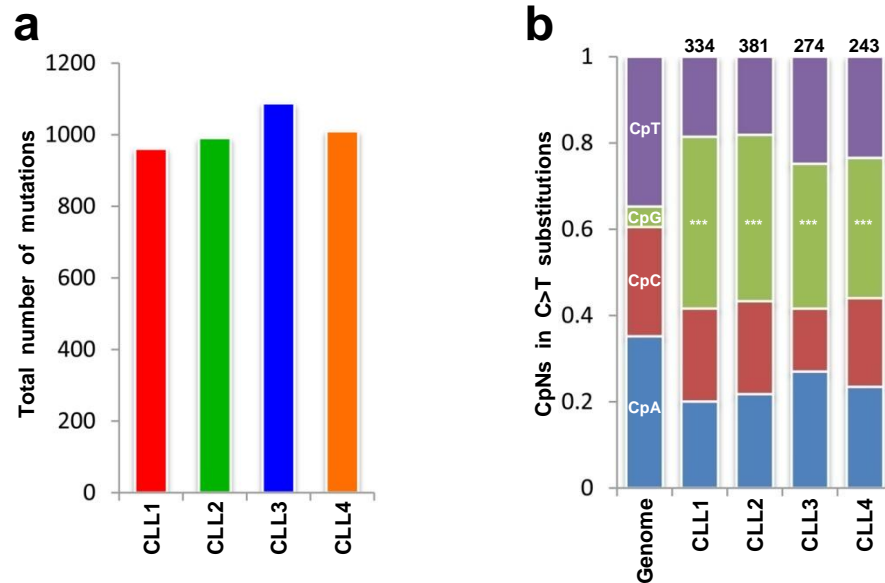

**Supplementary Figure 2.** **a**, Total number of somatic substitutions per genome. **b**, Distribution of the four possible CpN dinucleotides for the C>T transition in each tumour genome compared to the expected distribution across the genome. The total number of C>T substitutions per case is indicated at the top (\*\*\*,  $P < 10^{-42}$ ).

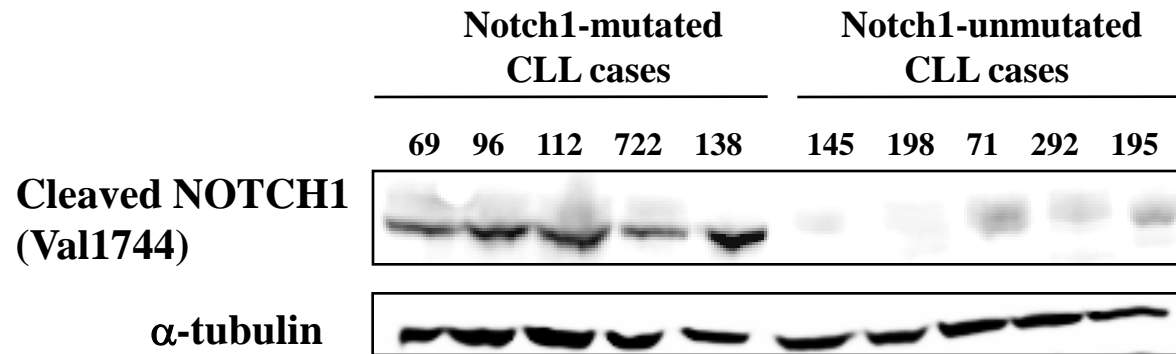

**Supplementary Figure 3.** Western blot showing NOTCH1 protein levels in CLL cases with or without the NOTCH1 p.P2515Rfs\*4 mutation using an antibody specific for the cleaved form of NOTCH1.

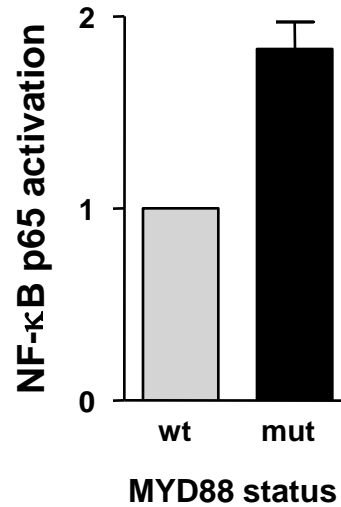

**Supplementary Figure 4.** p65 DNA-binding activity was analyzed by ELISA-based chemiluminescence in nuclear extracts obtained from 3 *MYD88*-mutated CLL cases and 3 *MYD88*-unmutated cases. DNA binding of mutated cases is expressed relative to the mean of unmutated cases.

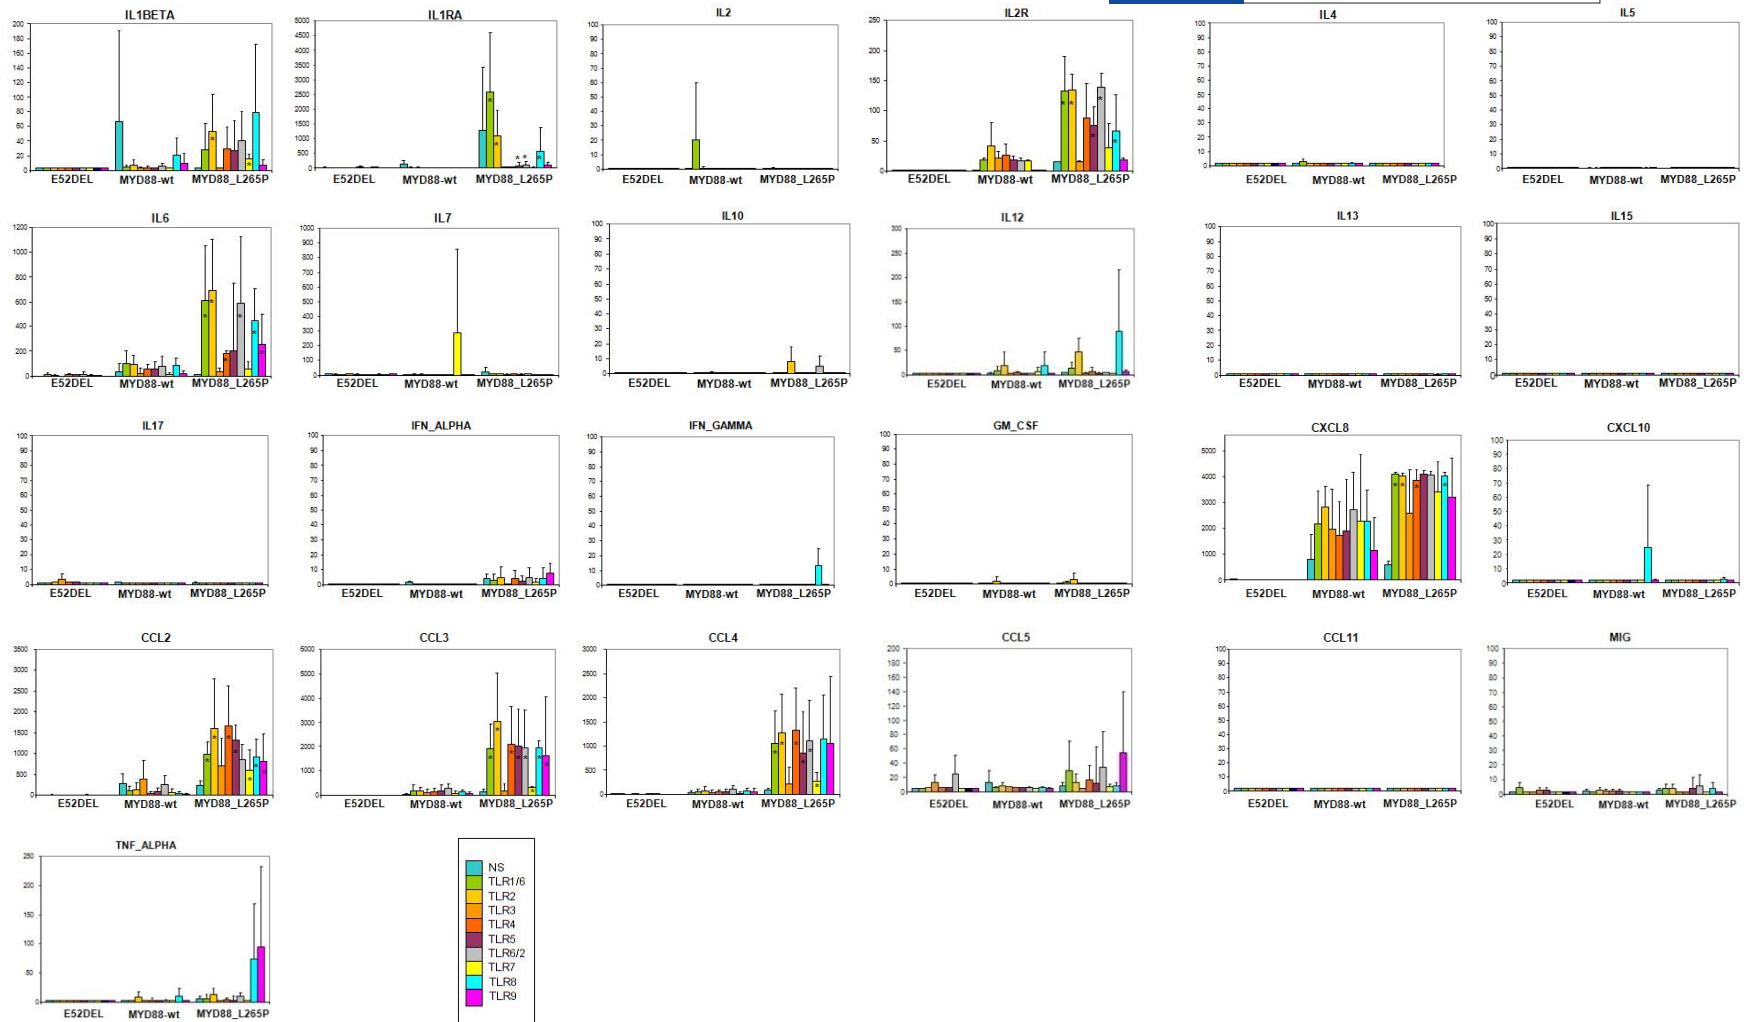

**Supplementary Figure 5.** Bar graphs displaying the median values of the cytokine levels detected in B-cell lymphocytes from patients with an inactivating *MYD88* mutation (E52DEL), CLL patients without *MYD88* mutation (*MYD88*-wt), and CLL patients carrying a mutated *MYD88* (L265P). In different colours are represented the stimulation experiment for each of the TLRs. Statistically differences between CLL patients with the *MYD88* (L265P) mutation vs. CLL patients without *MYD88* mutation are indicated with an asterisk (Mann-Whitney test,  $P < 0.05$ ).

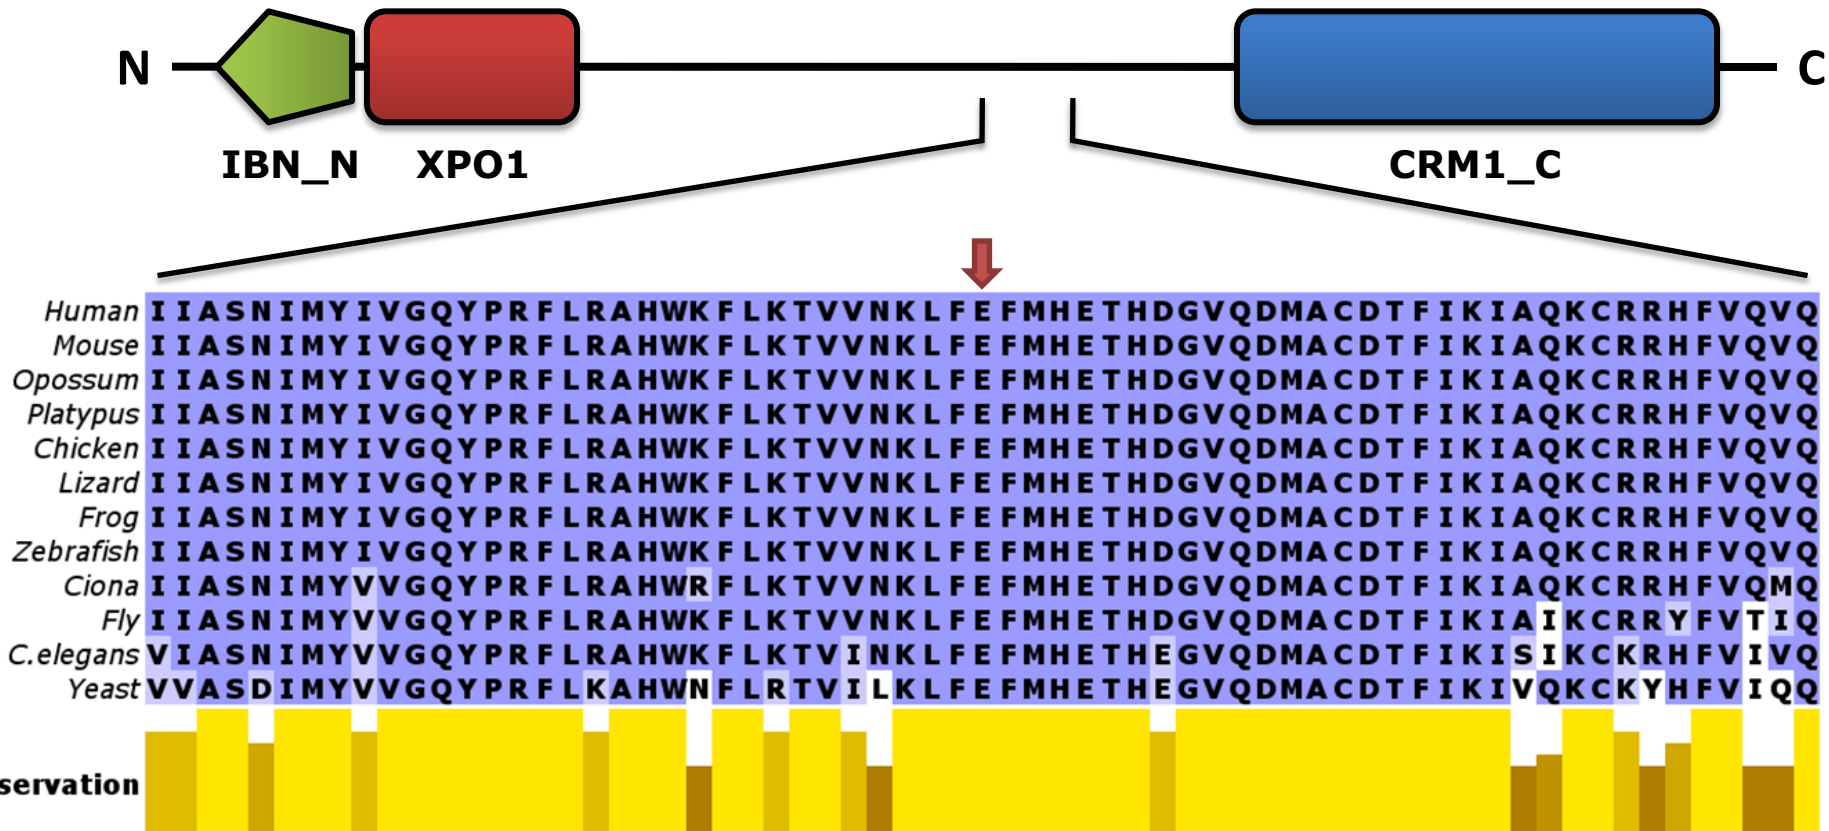

**Supplementary Figure 6.** Schematic representation of exportin 1 and multiple sequence alignment of the region containing the recurrent mutation identified in CLL tumours affecting residue E571 (indicated with a red arrow). IBN\_N: importin-beta N-terminal domain; XPO1: XPO1 N-terminal domain; CRM1\_C: CRM1 C-terminal domain.

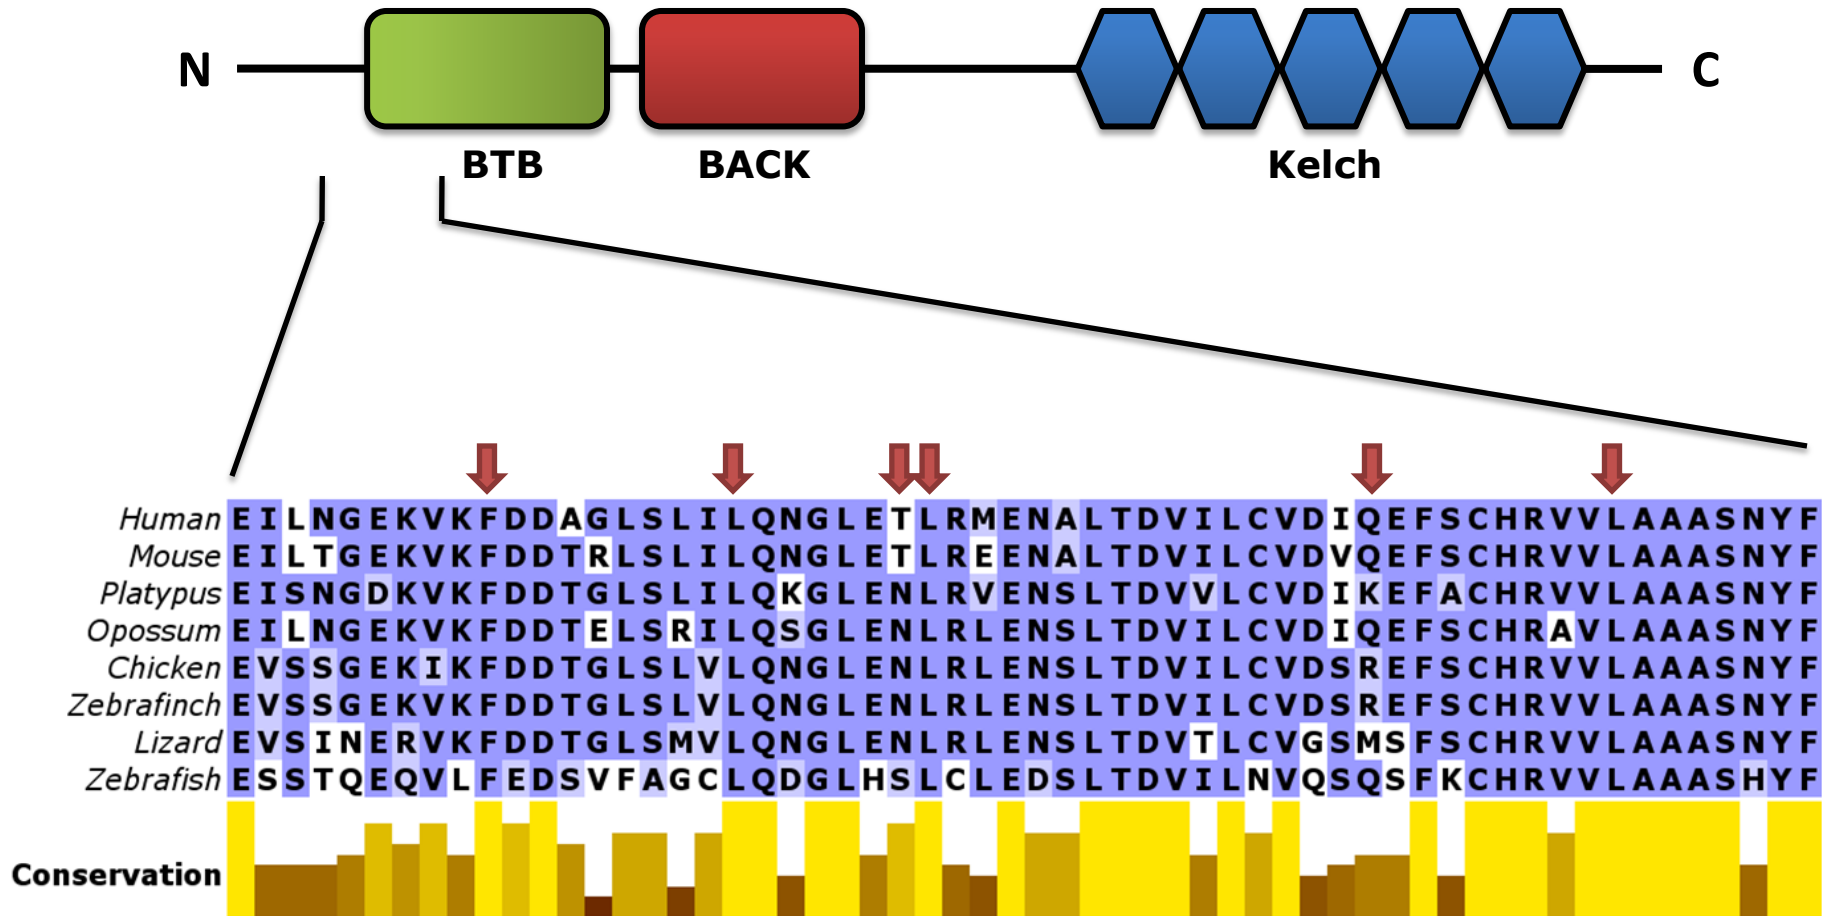

**Supplementary Figure 7.** Schematic representation of the domain structure of KLHL6 and multiple sequence alignment showing the location of six somatic mutations (red arrows) identified in CLL tumours. BTB: Broad-Complex, Tramtrack and Bric a brac domain; BACK: BTB and C-terminal Kelch domain.

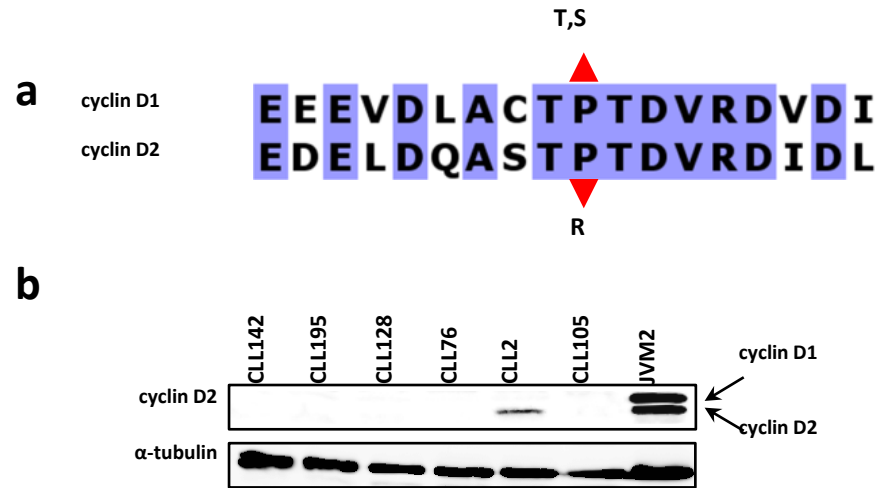

**Supplementary Figure 8. a**, Sequence alignment of the C-terminus of human cyclin D1 and cyclin D2. Arrows indicate the somatic mutation identified in CLL in cyclin D2, and the two somatic mutations identified in endometrial cancer with the corresponding substitutions. **b**, Western blot analysis of cyclin D2 in tumour cells from six CLL patients, including patient CLL2 with the p.P281R mutation. Extracts from the cell line JVM2 were used as control.

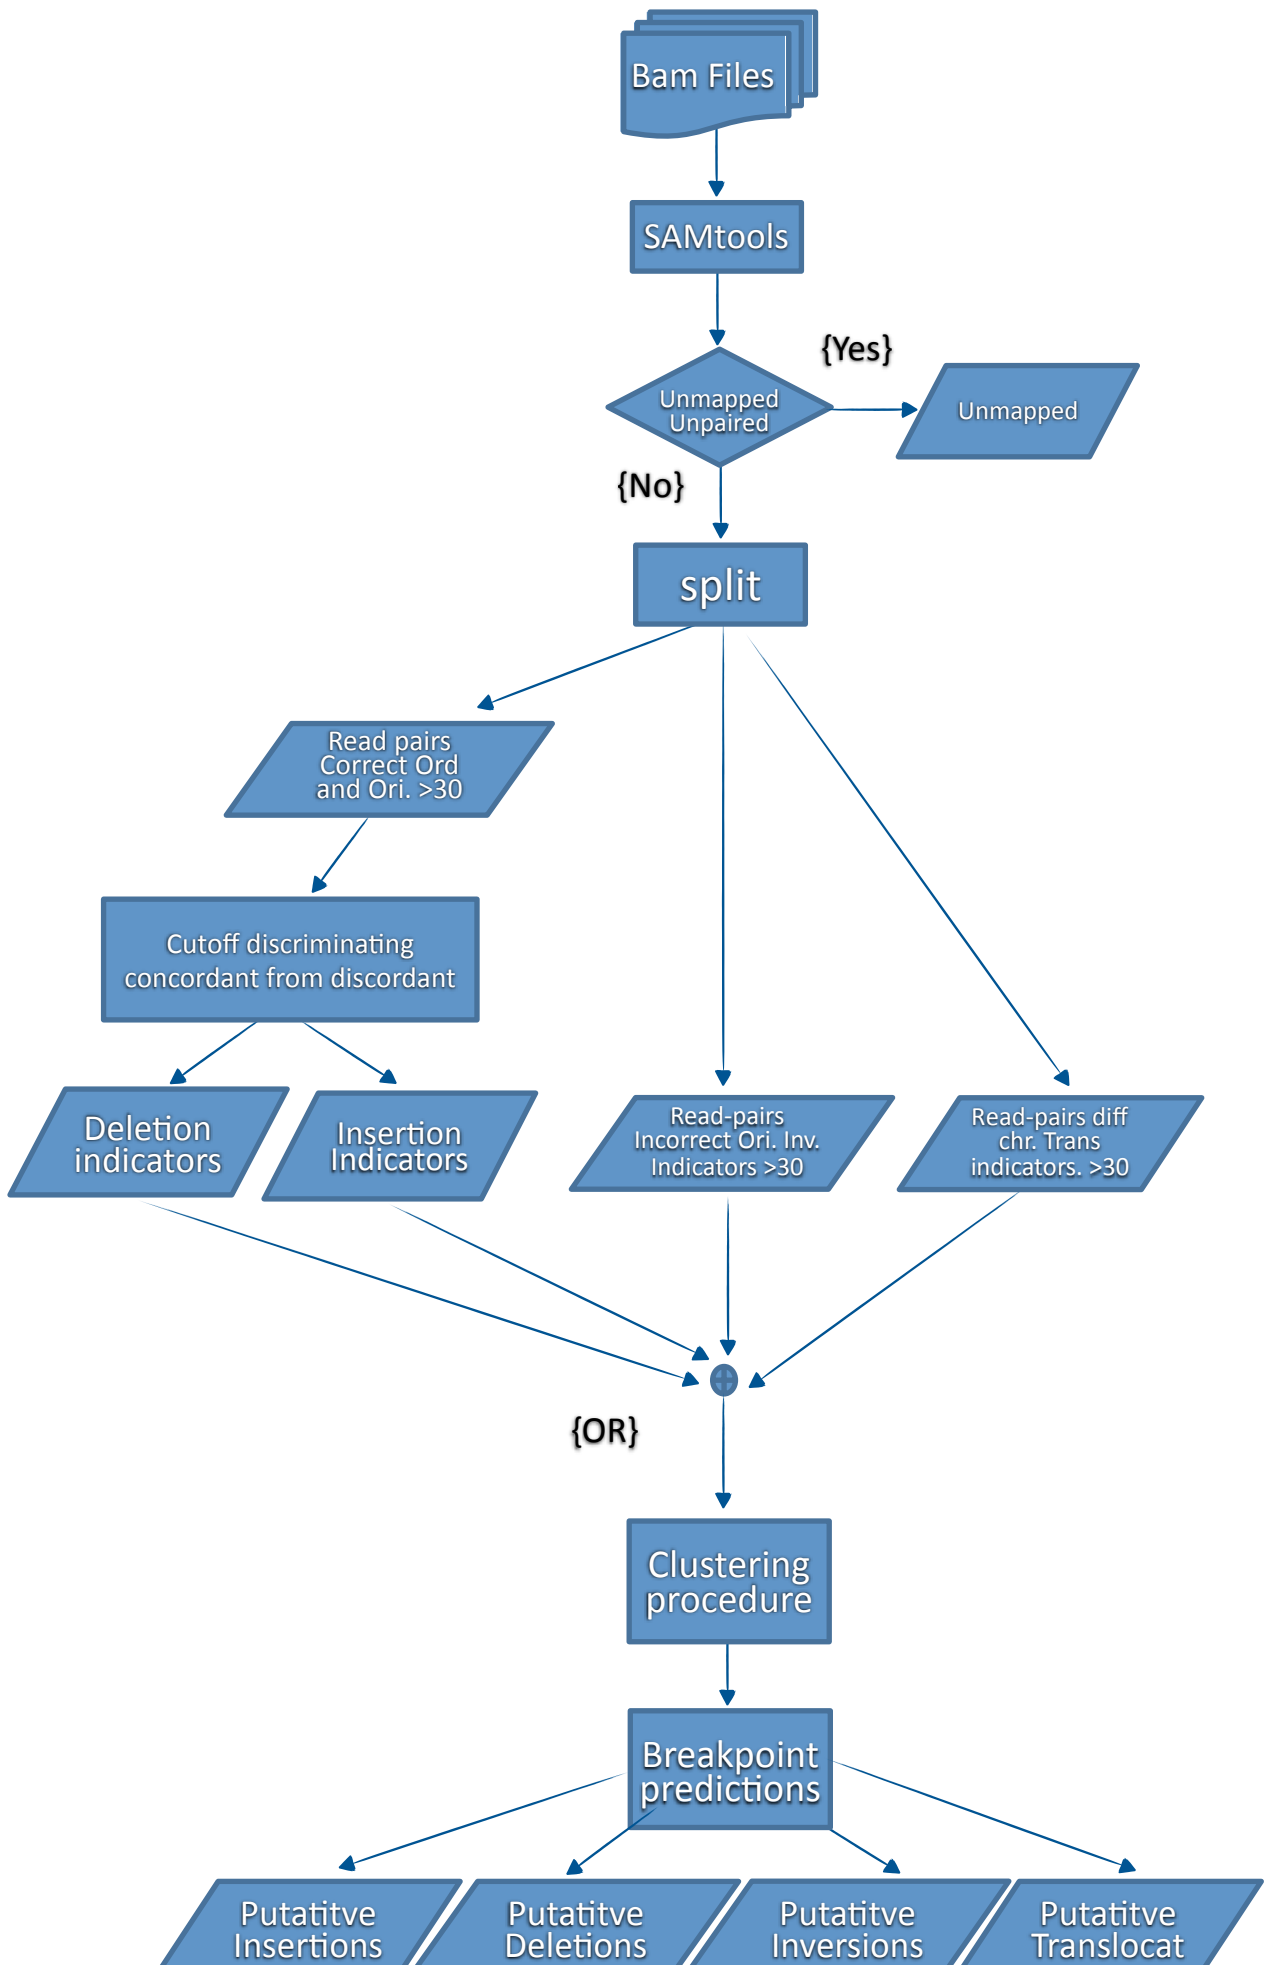

**Supplementary Figure 9.** Workflow describing the pipeline for analysis of SV. Rectangles indicate intermediate processes; diamonds show condition steps and rhomboids are files generated within the process.



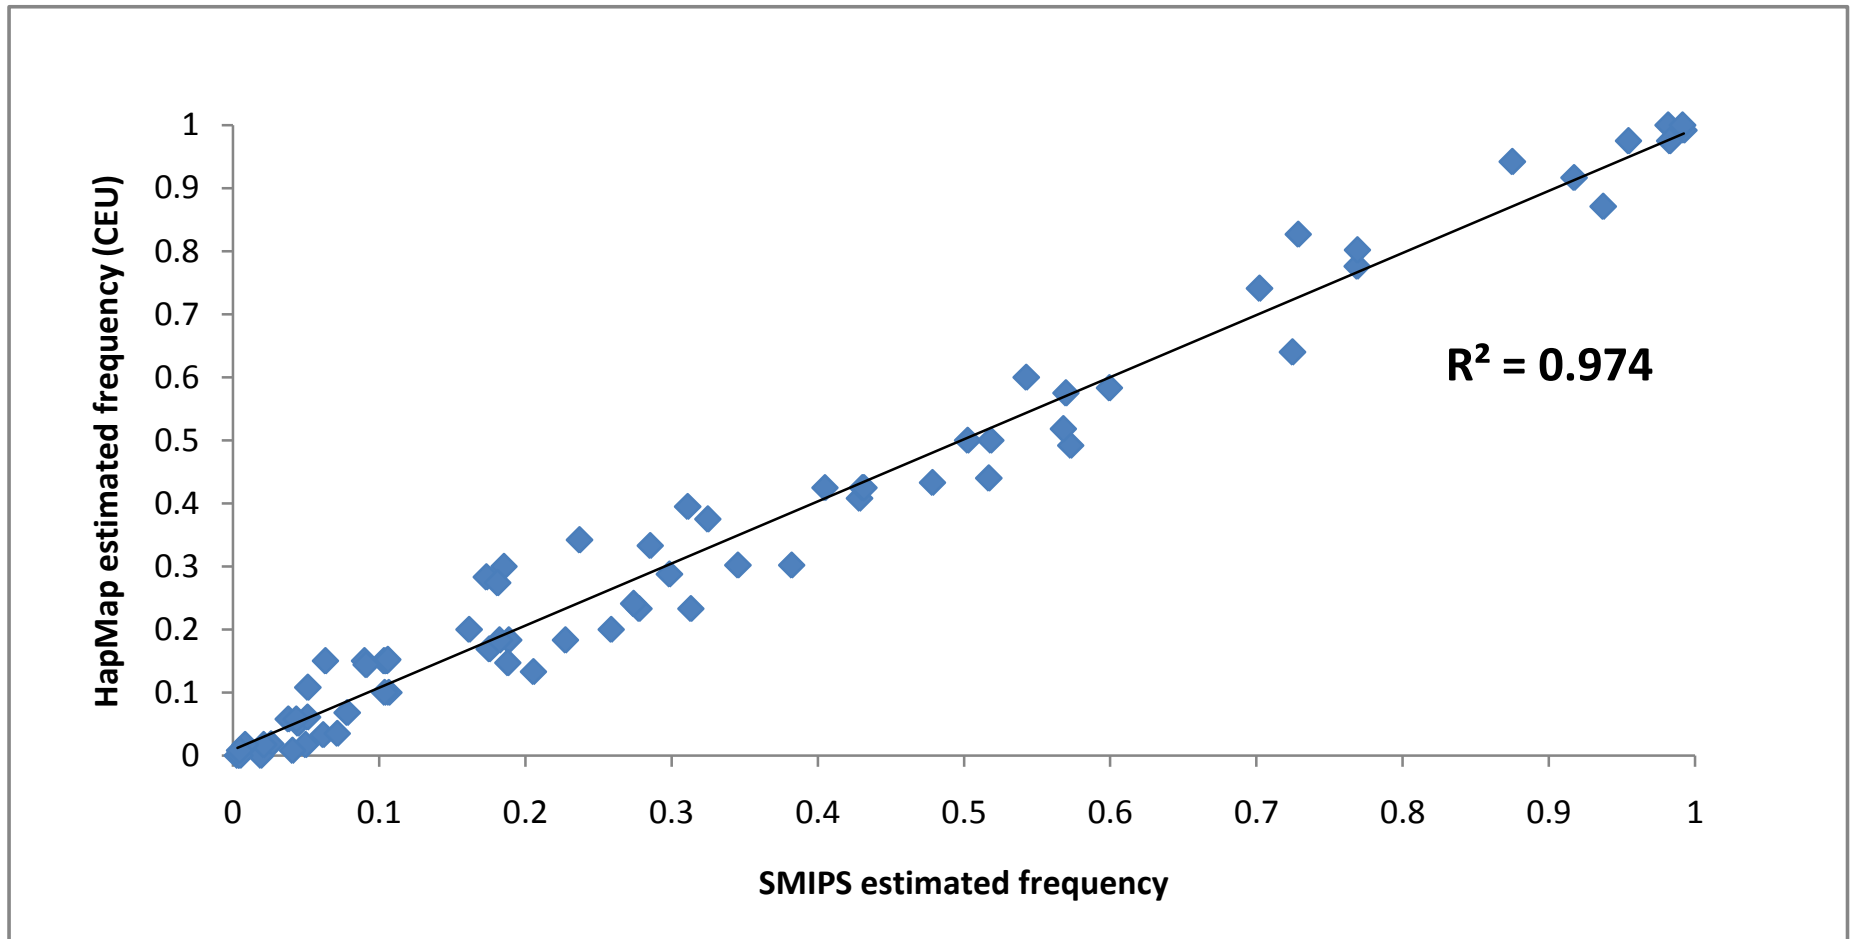

**Supplementary Figure 10.** Correlation between HapMap- and SMIPS-estimated allele frequencies for 72 SNPs included in the analysed regions.

**Supplementary Table 1. Clinical and biological features at diagnosis, evolution and sample characteristics of the four CLL patients studied by whole-genome sequencing**

|                                            | CLL1          | CLL2                | CLL3                  | CLL4                 |
|--------------------------------------------|---------------|---------------------|-----------------------|----------------------|
| Age                                        | 44            | 59                  | 45                    | 42                   |
| Gender                                     | Male          | Female              | Male                  | Female               |
| Stage at diagnosis                         | A(0)          | A(0)                | C(IV)                 | A(0)                 |
| Lymphocytes x10 <sup>9</sup> /L            | 8.2           | 22                  | 201.9                 | 10                   |
| Haemoglobin g/L                            | 139           | 132                 | 91                    | 151                  |
| Platelets x10 <sup>9</sup> /L              | 200           | 360                 | 75                    | 214                  |
| LDT                                        | >1 year       | >1 year             | NA                    | >1 year              |
| LDH (U/L)                                  | 338           | 299                 | 328                   | 360                  |
| β <sub>2</sub> -microglobulin mg/L         | ND            | 1.2                 | 5.3                   | 1.4                  |
| PB morphology                              | Atypical **   | Typical             | Typical               | Typical              |
| Immunophenotype                            | Typical       | Typical             | Typical               | Typical              |
| Bone marrow biopsy                         | Interstitial  | Interstitial        | Diffuse               | Nodular+Interstitial |
| ZAP70 (%)                                  | 8             | 39                  | 12                    | 2                    |
| CD38 (%)                                   | 11            | 98                  | 15                    | 12                   |
| Genetic alterations                        | del13q/del6q  | Complex alterations | del13q in homozygosis | del13q               |
| IGHV homology                              | 100%          | 100%                | 95.2%                 | 93.1%                |
| Progression                                | 6 years C(IV) | 7 years B(II)       | NA                    | 3 years A(I)         |
| Treatment                                  | FCM           | R-FCM               | FCM                   | R-FCM                |
| Response                                   | CR MRD+       | CR MRD+             | CR MRD-               | CR MRD-              |
| Time from diagnosis to tumour DNA sampling | 5.5 years     | 6.1 years           | 0.4 years             | 3.9 years            |
| Tumour DNA purity                          | 98.8%         | 99.5%               | 99.4%                 | 98%                  |
| Time from treatment to normal DNA sampling | 0.5 years     | 3 years             | 3.7 years             | 2 years              |
| Normal DNA purity                          | 100%          | 100%                | 100%                  | 100%                 |

LDT, Lymphocyte Doubling Time; NA, not applicable; ND, not done; FCM, fludarabine, cyclophosphamide, mitoxantrone; R-FCM, rituximab and FCM; CR, complete remission; MRD, minimal residual disease; \*\* Mixed cell

**Supplementary Table 2. Statistics for Whole-Genome Sequencing**

| Case | IGHV status | Sample | Number of reads mapped | Depth | Coverage | Cov. $\geq 10$ reads | Number of SNPs | Not in dbSNP (%) |
|------|-------------|--------|------------------------|-------|----------|----------------------|----------------|------------------|
| CLL1 | unmutated   | Normal | 1,160,452,910          | 42X   | 99.0%    | 97.8%                | 3,614,143      | 261,995 (7.25%)  |
|      |             | Tumour | 1,455,831,568          | 53X   | 99.0%    | 98.2%                | 3,629,099      | 265,329 (7.31%)  |
| CLL2 | unmutated   | Normal | 941,896,591            | 31X   | 98.5%    | 95.8%                | 3,469,363      | 213,168 (6.14%)  |
|      |             | Tumour | 996,700,520            | 33X   | 98.5%    | 96.1%                | 3,456,394      | 210,318 (6.08%)  |
| CLL3 | mutated     | Normal | 1,551,483,389          | 49X   | 99.1%    | 96.8%                | 3,832,713      | 331,559 (8.65%)  |
|      |             | Tumour | 861,785,635            | 31X   | 98.8%    | 98.0%                | 3,777,357      | 344,083 (9.10%)  |
| CLL4 | mutated     | Normal | 1,361,098,408          | 40X   | 99.0%    | 96.8%                | 3,454,075      | 202,905 (5.87%)  |
|      |             | Tumour | 1,369,552,707          | 41X   | 99.1%    | 97.4%                | 3,394,946      | 199,026 (5.86%)  |

**Supplementary Table 3. Statistics for Exome Sequencing**

| Case | IGHV status | Sample | Number of reads mapped | Depth | Exome Cov. | Cov. $\geq 10$ reads |
|------|-------------|--------|------------------------|-------|------------|----------------------|
| CLL1 | unmutated   | Normal | 107,937,237            | 99X   | 99.3%      | 93%                  |
|      |             | Tumour | 100,606,508            | 96X   | 99.3%      | 93%                  |
| CLL2 | unmutated   | Normal | 120,385,251            | 187X  | 99.3%      | 95%                  |
|      |             | Tumour | 114,365,205            | 179X  | 99.6%      | 96%                  |
| CLL3 | mutated     | Normal | 141,399,386            | 119X  | 99.2%      | 93%                  |
|      |             | Tumour | 111,236,146            | 70X   | 99.1%      | 91%                  |
| CLL4 | mutated     | Normal | 103,472,724            | 97X   | 99.3%      | 93%                  |
|      |             | Tumour | 113,362,146            | 107X  | 99.2%      | 93%                  |

**Supplementary Table 4. Statistics for Long Insert Paired-End Sequencing**

| Case | IGHV status | Sample | Number of reads mapped | Insert Size |
|------|-------------|--------|------------------------|-------------|
| CLL1 | unmutated   | Normal | 58,163,212             | 2540        |
|      |             | Tumour | 51,083,672             | 2476        |
| CLL2 | unmutated   | Normal | 80,703,724             | 2461        |
|      |             | Tumour | 110,167,808            | 2531        |
| CLL3 | mutated     | Normal | 67,835,175             | 2559        |
|      |             | Tumour | 60,419,198             | 2446        |
| CLL4 | mutated     | Normal | 69,367,176             | 2642        |
|      |             | Tumour | 111,110,742            | 2542        |

**Supplementary Table 5. Structural Variants in CLL tumours detected by paired-end analysis.**

| Sample | Chr | Cytoband     | Start (bp) | End (bp)  | Size (Mb) | CN Estimate | Structural Variant  | CLL Alteration |
|--------|-----|--------------|------------|-----------|-----------|-------------|---------------------|----------------|
| CLL1   | 6   | q14.1-q22.2  | 78688092   | 118428895 | 39.74     | 1           | Deletion            | Known          |
| CLL1   | 13  | q14.2-q14.3  | 49883705   | 52299307  | 2.41      | 1           | Deletion            | Known          |
| CLL2   | 1   | q21.1        | 144597148  | 147730898 | 3.13      | 3           | Fold-back inversion | Novel          |
| CLL2   | 1   | q25.2        | 177162885  | 180234801 | 3.07      | 3           | Tandem duplication  | Novel          |
| CLL2   | 2   | p16.1-p15    | 59155728   | 61892257  | 2.73      | 3           | Tandem duplication  | Known          |
| CLL2   | 3   | q26.2-q26.31 | 168533864  | 171596966 | 3.07      | 3           | Complex insertion   | Novel          |
| CLL2   | 6   | q15-q16.1    | 89756638   | 92803277  | 3.05      | 3           | Complex insertion   | Novel          |
| CLL2   | 12  | q13.13-q13.2 | 52611909   | 55200910  | 2.59      | 3           | Complex insertion   | Known          |
| CLL3   | 13  | q14.3        | 50551421   | 51386741  | 0.83      | 0           | Homozygous deletion | Known          |
|        |     |              | 50521570   | 51558441  | 1.03      |             |                     |                |
| CLL4   | 13  | q14.2-q22.1  | 48679885   | 74276206  | 25.59     | 1           | Deletion            | Known          |

CN: copy number estimate by WGS and Affymetrix 6.0 and Agilent 1M arrays; Genomic positions are based on genome assembly GRCh37/hg19. All changes in antigen receptor loci were excluded (IGK@ 2p11.2, TRG@ 7p14.1, TRB@ 7q34, TRA@ 14q11.2, IGH@ 14q32.33, and IGL@ 22q11.2)

Supplementary Table 7. Class 1 and 2 mutations identified in the 4 CLL cases.

| Case | Symbol    | Ensembl Accession | Mutation Type  | Effect     | Chr | Position  | Ref. | Obs | Protein Name                                              | Expressed |
|------|-----------|-------------------|----------------|------------|-----|-----------|------|-----|-----------------------------------------------------------|-----------|
| CLL1 | FUT9      | ENSG00000172461   | frameshift     | K51*fs     | 6   | 96651182  | AA   | T   | fucosyltransferase 9                                      | Yes       |
| CLL1 | B3GAT2    | ENSG00000112309   | non_synonymous | Y83F       | 6   | 71665885  | T    | W   | galactosylgalactosylxylosylprotein 3-beta-glucuronosyl    | No        |
| CLL1 | CNOT3     | ENSG00000088038   | non_synonymous | E20K       | 19  | 54646887  | G    | R   | CCR4-NOT transcription complex, subunit 3                 | Yes       |
| CLL1 | CYP2A7    | ENSG00000198077   | non_synonymous | L298F      | 19  | 41383838  | G    | R   | cytochrome P450, family 2, subfamily A, polypeptide 7     | No        |
| CLL1 | FSIP2     | ENSG00000188738   | non_synonymous | T2526R     | 2   | 186659440 | C    | S   | fibrous sheath interacting protein 2                      | No        |
| CLL1 | OR1L8     | ENSG00000171496   | non_synonymous | N43K       | 9   | 125330628 | G    | K   | olfactory receptor, family 1, subfamily L, member 8       | No        |
| CLL1 | ROBO1     | ENSG00000169855   | non_synonymous | A897V      | 3   | 78700896  | G    | R   | roundabout, axon guidance receptor, homolog 1             | Yes       |
| CLL1 | SETD5     | ENSG00000168137   | non_synonymous | Q787*      | 3   | 9495435   | C    | Y   | SET domain containing 5                                   | Yes       |
| CLL1 | SYNE1     | ENSG00000131018   | non_synonymous | V1167I     | 6   | 152770673 | C    | Y   | spectrin repeat containing, nuclear envelope 1            | No        |
| CLL1 | TRPV4     | ENSG00000111199   | non_synonymous | V620I      | 12  | 110230201 | C    | Y   | ransient receptor potential cation channel, subfamily V   | No        |
| CLL1 | ABCB5     | ENSG00000004846   | synonymous     | I956I      | 7   | 20778606  | A    | W   | ATP-binding cassette sub-family B member 5 isoform 1      | Yes       |
| CLL1 | DENND4A   | ENSG00000174485   | synonymous     | C1291C     | 15  | 65983059  | G    | R   | DENN/MADD domain containing 4A                            | Yes       |
| CLL1 | TRPM6     | ENSG00000119121   | synonymous     | P933P      | 9   | 77400910  | A    | M   | transient receptor potential cation channel, subfamily    | No        |
| CLL1 | AK2       | ENSG00000004455   | 3p_UTR         | -          | 1   | 33474552  | C    | Y   | adenylate kinase 2                                        | Yes       |
| CLL1 | ARHGEF38  | ENSG00000236699   | 3p_UTR         | -          | 4   | 106599672 | G    | R   | Rho guanine nucleotide exchange factor (GEF) 38           | No        |
| CLL1 | CEP170    | ENSG00000143702   | 5p_UTR         | -          | 1   | 243319878 | C    | Y   | centrosomal protein 170kDa                                | Yes       |
| CLL1 | CLN8      | ENSG00000182372   | 3p_UTR         | -          | 8   | 1733881   | T    | K   | ceroid-lipofuscinosis, neuronal 8                         | Yes       |
| CLL1 | CYP4A22   | ENSG00000162365   | 3p_UTR         | -          | 1   | 47611843  | G    | R   | cytochrome P450, family 4, subfamily A, polypeptide 2     | No        |
| CLL1 | IL20RB    | ENSG00000174564   | 5p_UTR         | -          | 3   | 136676936 | G    | R   | interleukin 20 receptor beta                              | Yes       |
| CLL1 | KDM3A     | ENSG00000115548   | 5p_UTR         | -          | 2   | 86667987  | C    | M   | lysine (K)-specific demethylase 3A                        | Yes       |
| CLL1 | RASSF6    | ENSG00000169435   | 3p_UTR         | -          | 4   | 74440620  | C    | M   | Ras association (RalGDS/AF-6) domain family member        | No        |
| CLL1 | SCLT1     | ENSG00000151466   | 5p_UTR         | -          | 4   | 130014445 | A    | W   | sodium channel and clathrin linker 1                      | Yes       |
| CLL2 | GPCPD1    | ENSG00000125772   | frameshift     | I558*fs    | 20  | 5538748   | CCC  | A   | glycerophosphocholine phosphodiesterase GDE1 hom          | Yes       |
| CLL2 | NOTCH1    | ENSG00000148400   | frameshift     | P2515R*fs4 | 9   | 139390648 | AG   | *   | Notch1                                                    | Yes       |
| CLL2 | ACER2     | ENSG00000177076   | non_synonymous | R173L      | 9   | 19446293  | G    | K   | alkaline ceramidase 2                                     | Yes       |
| CLL2 | C14orf39  | ENSG00000179008   | non_synonymous | A548D      | 14  | 60903684  | G    | K   | Protein SIX6OS1                                           | No        |
| CLL2 | CCND2     | ENSG00000118971   | non_synonymous | P281R      | 12  | 4409147   | C    | S   | cyclin D2                                                 | Yes       |
| CLL2 | CDH9      | ENSG00000113100   | non_synonymous | P363L      | 5   | 26902750  | G    | R   | cadherin 9, type 2                                        | No        |
| CLL2 | DMD       | ENSG00000198947   | non_synonymous | I2550L     | X   | 31747760  | T    | K   | dystrophin                                                | No        |
| CLL2 | ELOVL6    | ENSG00000170522   | non_synonymous | A185T      | 4   | 110972739 | C    | Y   | elongation of long chain fatty acids family member 6      | No        |
| CLL2 | F13A1     | ENSG00000124491   | non_synonymous | R159H      | 6   | 6266886   | C    | Y   | coagulation factor XIII, A1 polypeptide                   | No        |
| CLL2 | KIAA1324  | ENSG00000116299   | non_synonymous | S852R      | 1   | 109742530 | C    | S   | KIAA1324                                                  | No        |
| CLL2 | LLGL1     | ENSG00000131899   | non_synonymous | R955C      | 17  | 18145294  | C    | Y   | lethal giant larvae homolog 1                             | Yes       |
| CLL2 | MERIT40   | ENSG00000105393   | non_synonymous | Y217C      | 19  | 17387384  | A    | R   | BRCA1-A complex subunit MERIT40                           | Yes       |
| CLL2 | MGA       | ENSG00000174197   | non_synonymous | R1242P     | 15  | 42021429  | G    | S   | MAX gene associated                                       | No        |
| CLL2 | PIK3R2    | ENSG00000105647   | non_synonymous | R539H      | 19  | 18277996  | G    | R   | phosphoinositide-3-kinase, regulatory subunit 2           | Yes       |
| CLL2 | RBBP9     | ENSG00000089050   | non_synonymous | D46N       | 20  | 18476488  | C    | Y   | retinoblastoma binding protein 9                          | Yes       |
| CLL2 | SLC45A2   | ENSG00000164175   | non_synonymous | T412M      | 5   | 33947401  | G    | R   | solute carrier family 45, member 2                        | No        |
| CLL2 | UGT2B11   | ENSG00000213759   | non_synonymous | P453A      | 4   | 70066391  | G    | S   | UDP glucuronosyltransferase 2 family, polypeptide B1      | No        |
| CLL2 | UNC119B   | ENSG00000175970   | non_synonymous | Q251R      | 12  | 121157831 | AG   | GT  | unc-119 homolog B                                         | Yes       |
| CLL2 | VWF       | ENSG00000110799   | non_synonymous | R2464H     | 12  | 6085323   | C    | Y   | von Willebrand factor                                     | No        |
| CLL2 | XPO1      | ENSG00000082898   | non_synonymous | E571K      | 2   | 61719472  | C    | Y   | exportin 1                                                | Yes       |
| CLL2 | HK3       | ENSG00000160883   | synonymous     | S833S      | 5   | 176308431 | G    | R   | hexokinase 3                                              | No        |
| CLL2 | MAGEE1    | ENSG00000198934   | synonymous     | T875T      | X   | 75650948  | C    | S   | melanoma antigen family E, 1                              | Yes       |
| CLL2 | PDE4DIP   | ENSG00000178104   | synonymous     | A2374A     | 1   | 144856852 | C    | Y   | phosphodiesterase 4D interacting protein                  | No        |
| CLL2 | PXDNL     | ENSG00000147485   | synonymous     | P650P      | 8   | 52323922  | G    | R   | peroxidasin homolog (Drosophila)-like                     | No        |
| CLL2 | TSHZ2     | ENSG00000182463   | synonymous     | K1006K     | 20  | 51873015  | A    | R   | teashirt zinc finger homeobox 2                           | Yes       |
| CLL2 | EPHA4     | ENSG00000116106   | 3p_UTR         | -          | 2   | 222283824 | G    | R   | EPH receptor A4                                           | No        |
| CLL2 | GDA       | ENSG00000119125   | 3p_UTR         | -          | 9   | 74863584  | T    | Y   | guanine deaminase                                         | No        |
| CLL2 | SPATA18   | ENSG00000163071   | 3p_UTR         | -          | 4   | 52962403  | C    | M   | spermatogenesis associated 18 homolog                     | No        |
| CLL2 | SIKE1     | ENSG00000052723   | 5p_UTR         | -          | 1   | 115323009 | T    | K   | suppressor of IKBKE 1                                     | Yes       |
| CLL2 | ZNF518A   | ENSG00000177853   | 5p_UTR         | -          | 10  | 97911272  | A    | W   | zinc finger protein 518A                                  | No        |
| CLL3 | CD8A      | ENSG00000153563   | frameshift     | E37*fs     | 2   | 87017743  | C    | +T  | CD8 antigen alpha polypeptide isoform 1                   | Yes       |
| CLL3 | ZNF37A    | ENSG00000075407   | frameshift     | T294*fs    | 10  | 38406960  | C    | -AG | zinc finger protein 37A                                   | Yes       |
| CLL3 | ABI3BP    | ENSG00000154175   | non_synonymous | V678F      | 3   | 100499051 | C    | M   | ABI gene family, member 3 (NESH) binding protein          | No        |
| CLL3 | KIR3DL1   | ENSG00000136856   | non_synonymous | V272I      | 19  | 55333178  | G    | R   | killer cell immunoglobulin-like receptor, three domain    | No        |
| CLL3 | KLHL6     | ENSG00000172578   | non_synonymous | L65P       | 3   | 183273248 | A    | R   | kelch-like 6                                              | Yes       |
| CLL3 | KLHL6     | ENSG00000172578   | non_synonymous | F49L       | 3   | 183273297 | A    | R   | kelch-like 6                                              | Yes       |
| CLL3 | MYD88     | ENSG00000172936   | non_synonymous | L265P      | 3   | 38182641  | T    | Y   | myeloid differentiation primary response gene (88)        | Yes       |
| CLL3 | PPP1R9A   | ENSG00000158528   | non_synonymous | S1283Y     | 7   | 94917966  | C    | M   | protein phosphatase 1, regulatory (inhibitor)             | Yes       |
| CLL3 | SCN11A    | ENSG00000168356   | non_synonymous | R222P      | 3   | 38966953  | C    | S   | sodium channel, voltage-gated, type XI, alpha             | No        |
| CLL3 | SLC2A8    | ENSG00000136856   | non_synonymous | G337S      | 9   | 130167129 | G    | R   | solute carrier family 2 (facilitated glucose transporter) | Yes       |
| CLL3 | EFR3A     | ENSG00000132294   | splicing-site  | -          | 8   | 132989340 | G    | S   | EFR3 homolog A                                            | Yes       |
| CLL3 | CELA3A    | ENSG00000142789   | synonymous     | L145L      | 1   | 22333395  | C    | S   | elastase 3A                                               | No        |
| CLL3 | SMC2      | ENSG00000136824   | synonymous     | A858A      | 9   | 106889044 | A    | M   | structural maintenance of chromosomes 2                   | Yes       |
| CLL3 | AGXT2L2   | ENSG00000175309   | 3p_UTR         | -          | 5   | 177638688 | T    | K   | alanine-glyoxylate aminotransferase 2-like 2              | Yes       |
| CLL3 | BMPRI1B   | ENSG00000138696   | 3p_UTR         | -          | 4   | 96078173  | A    | R   | bone morphogenetic protein receptor, type IB              | No        |
| CLL3 | C10orf108 | ENSG00000180525   | 3p_UTR         | -          | 10  | 709729    | C    | M   | chromosome 10 open reading frame 108                      | No        |
| CLL3 | DKK2      | ENSG00000155011   | 3p_UTR         | -          | 4   | 107844936 | G    | K   | dickkopf homolog 2 precursor                              | No        |
| CLL3 | KRT31     | ENSG00000094796   | 3p_UTR         | -          | 17  | 39549987  | T    | Y   | keratin 31                                                | No        |
| CLL3 | MDGA2     | ENSG00000139915   | 3p_UTR         | -          | 14  | 47310653  | T    | W   | MAM domain containing glycosylphosphatidylinositol        | No        |
| CLL3 | POLK      | ENSG00000122008   | 3p_UTR         | -          | 5   | 74895632  | C    | S   | DNA-directed DNA polymerase kappa                         | Yes       |
| CLL3 | RERGL     | ENSG00000111404   | 3p_UTR         | -          | 12  | 18234101  | T    | Y   | RERG/RAS-like                                             | No        |
| CLL4 | SNX7      | ENSG00000162627   | non_synonymous | L383I      | 1   | 99203814  | C    | M   | sorting nexin 7 isoform a                                 | Yes       |

|      |          |                 |                |       |    |           |   |   |                                                  |     |
|------|----------|-----------------|----------------|-------|----|-----------|---|---|--------------------------------------------------|-----|
| CLL4 | GRM3     | ENSG00000198822 | non_synonymous | R352Q | 7  | 86416163  | G | R | glutamate receptor, metabotropic 3 precursor     | Yes |
| CLL4 | SLC25A40 | ENSG00000075303 | non_synonymous | I149V | 7  | 87477180  | T | Y | mitochondrial carrier family protein             | Yes |
| CLL4 | C13orf23 | ENSG00000120685 | non_synonymous | I229T | 13 | 39596507  | A | R | Uncharacterized protein C13orf23                 | Yes |
| CLL4 | MBP      | ENSG00000197971 | non_synonymous | I287F | 18 | 74696742  | T | W | myelin basic protein                             | Yes |
| CLL4 | DOCK4    | ENSG00000128512 | synonymous     | G913G | 7  | 111474740 | C | M | dedicator of cytokinesis 4                       | No  |
| CLL4 | FLRT2    | ENSG00000185070 | synonymous     | I634I | 14 | 86089760  | T | Y | fibronectin leucine rich transmembrane protein 2 | No  |
| CLL4 | NIPA2    | ENSG00000140157 | synonymous     | S259S | 15 | 23006527  | T | K | on imprinted in Prader-Willi/Angelman syndrome   | Yes |
| CLL4 | MCFD2    | ENSG00000180398 | 3p_UTR         | -     | 2  | 47129227  | A | R | multiple coagulation factor deficiency 2         | Yes |
| CLL4 | SYNPO2   | ENSG00000172403 | 3p_UTR         | -     | 4  | 119981524 | C | Y | synaptopodin 2                                   | No  |
| CLL4 | SEPHS1   | ENSG00000086475 | 3p_UTR         | -     | 10 | 13359781  | C | Y | selenophosphate synthetase 1                     | Yes |
| CLL4 | FAM171A1 | ENSG00000148468 | 3p_UTR         | -     | 10 | 15254137  | C | M | family with sequence similarity 171, member A1   | No  |
| CLL4 | SYT4     | ENSG00000132872 | 3p_UTR         | -     | 18 | 40850140  | T | Y | synaptotagmin IV                                 | No  |
| CLL4 | CXCR6    | ENSG00000172215 | 5p_UTR         | -     | 3  | 45987195  | A | R | chemokine (C-X-C motif) receptor 6               | No  |



Supplementary Table 8. Mutations and characteristics of the clinical validation series

| Patient Code | <i>IGHV</i> Mutational Status | ZAP-70 | CD38 | <i>NOTCH1</i> | <i>MYD88</i> | <i>XPO1</i> | <i>KLHL6</i> | Validation Sets |
|--------------|-------------------------------|--------|------|---------------|--------------|-------------|--------------|-----------------|
| 1            | Unmutated                     | 8      | 11   | NV            | WT           | WT          | NV           | SMIPS           |
| 2            | Unmutated                     | 39     | 98   | P2515Rfs*4    | NA           | E571K       | NA           | EV              |
| 3            | Mutated                       | 12     | 15   | WT            | L265P        | WT          | F49L,L65P    | SMIPS           |
| 4            | Mutated                       | 2      | 12   | WT            | WT           | WT          | WT           | SMIPS           |
| 5            | Unmutated                     | 64     | 20   | NV            | WT           | WT          | WT           | SMIPS           |
| 6            | Mutated                       | 16     | 2    | WT            | WT           | WT          | WT           | SMIPS           |
| 7            | Unmutated                     | 42     | 85   | WT            | WT           | WT          | WT           | SMIPS           |
| 8            | Mutated                       | 5      | 10   | WT            | WT           | WT          | WT           | SMIPS           |
| 9            | Unmutated                     | 26     | 17   | WT            | WT           | WT          | WT           | SMIPS           |
| 10           | NA                            | 36     | 10   | NA            | WT           | NA          | NA           | EV              |
| 11           | Unmutated                     | 0      | 0    | WT            | WT           | WT          | WT           | SMIPS           |
| 12           | Unmutated                     | 57     | 18   | WT            | WT           | WT          | NV           | SMIPS           |
| 13           | Mutated                       | 3      | 10   | WT            | WT           | WT          | WT           | SMIPS           |
| 14           | Mutated                       | 12     | 2    | P2515Rfs*4    | WT           | WT          | WT           | SMIPS           |
| 15           | Unmutated                     | 67     | 0    | WT            | WT           | WT          | WT           | SMIPS           |
| 16           | NA                            | 13     | 0    | NV            | WT           | WT          | WT           | SMIPS           |
| 17           | Mutated                       | 10     | 88   | P2515Rfs*4    | WT           | WT          | WT           | SMIPS           |
| 18           | Unmutated                     | 44     | 44   | WT            | WT           | WT          | WT           | SMIPS           |
| 19           | Mutated                       | 0      | 6    | WT            | L265P        | WT          | NV           | SMIPS           |
| 20           | Unmutated                     | 42     | 32   | NV            | WT           | WT          | WT           | SMIPS           |
| 21           | Unmutated                     | 18     | 90   | WT            | WT           | WT          | WT           | SMIPS           |
| 22           | Unmutated                     | 24     | 45   | P2515Rfs*4    | NA           | NA          | NA           | EV              |
| 23           | Unmutated                     | 1      | 4    | WT            | WT           | WT          | WT           | SMIPS           |
| 24           | Unmutated                     | 51     | 44   | WT            | WT           | WT          | WT           | SMIPS           |
| 25           | Unmutated                     | 1      | 0    | NV            | WT           | WT          | WT           | SMIPS           |
| 26           | Unmutated                     | 13     | 18   | NV            | WT           | WT          | WT           | SMIPS           |
| 27           | Unmutated                     | 18     | 79   | WT            | WT           | WT          | WT           | SMIPS           |
| 28           | Mutated                       | 1      | 97   | WT            | WT           | WT          | WT           | SMIPS           |
| 29           | Mutated                       | NA     | 25   | WT            | WT           | WT          | NV           | SMIPS           |
| 30           | Mutated                       | 0      | 0    | WT            | L265P        | WT          | WT           | SMIPS           |
| 31           | Mutated                       | 0      | 0    | WT            | WT           | WT          | WT           | SMIPS           |
| 32           | Unmutated                     | 0      | 50   | WT            | WT           | NA          | NA           | SMIPS           |
| 33           | Unmutated                     | 30     | 80   | WT            | WT           | WT          | WT           | SMIPS           |
| 34           | Mutated                       | 0.4    | 2.5  | WT            | WT           | WT          | WT           | SMIPS           |
| 35           | Mutated                       | 2      | 1    | WT            | WT           | WT          | WT           | SMIPS           |
| 36           | Mutated                       | 36     | 11   | WT            | WT           | WT          | WT           | SMIPS           |
| 37           | Unmutated                     | 14     | 13   | NV            | WT           | WT          | WT           | SMIPS           |
| 38           | Mutated                       | 12     | 10   | WT            | WT           | WT          | WT           | SMIPS           |
| 39           | NA                            | 26     | 26   | WT            | WT           | WT          | WT           | SMIPS           |
| 40           | Mutated                       | 9      | 91   | WT            | WT           | WT          | NV           | SMIPS           |
| 41           | Mutated                       | 2      | 4    | WT            | WT           | WT          | WT           | SMIPS           |
| 42           | Mutated                       | 44     | 75   | NV            | WT           | WT          | WT           | SMIPS           |
| 43           | Unmutated                     | 65     | 98   | P2515Rfs*4    | WT           | NV          | WT           | SMIPS           |
| 44           | Mutated                       | 19     | 0.4  | NV            | WT           | WT          | L90F         | SMIPS           |
| 45           | Mutated                       | 6      | 8    | NV            | WT           | NV          | WT           | SMIPS           |
| 46           | Unmutated                     | 3      | 2    | NV            | WT           | WT          | WT           | SMIPS           |
| 47           | Unmutated                     | 25     | 98   | WT            | WT           | WT          | WT           | SMIPS           |
| 48           | Unmutated                     | 14     | 45   | WT            | WT           | WT          | WT           | SMIPS           |
| 49           | Unmutated                     | 0      | 0    | WT            | WT           | WT          | WT           | SMIPS           |
| 50           | Unmutated                     | 0      | 0    | WT            | WT           | WT          | WT           | SMIPS           |
| 51           | Mutated                       | 0      | 22   | WT            | WT           | WT          | WT           | SMIPS           |
| 52           | Mutated                       | 0      | 0    | WT            | WT           | WT          | WT           | SMIPS           |
| 53           | Unmutated                     | 7      | 87   | WT            | WT           | WT          | WT           | SMIPS           |
| 54           | Mutated                       | 0.9    | 16   | NV            | WT           | NV          | WT           | SMIPS           |
| 55           | Mutated                       | NA     | 1    | WT            | WT           | WT          | NV           | SMIPS           |
| 56           | Unmutated                     | 2      | 0    | WT            | WT           | WT          | WT           | SMIPS           |
| 57           | Unmutated                     | NA     | NA   | WT            | NV           | WT          | WT           | SMIPS           |
| 58           | Unmutated                     | 73     | NA   | P2515Rfs*4    | WT           | WT          | NV           | SMIPS           |

|     |           |      |    |            |       |       |    |       |
|-----|-----------|------|----|------------|-------|-------|----|-------|
| 59  | Mutated   | 0    | NA | WT         | WT    | WT    | WT | SMIPS |
| 60  | Unmutated | 23   | 20 | WT         | WT    | WT    | WT | SMIPS |
| 61  | Unmutated | 54   | 15 | WT         | WT    | WT    | WT | SMIPS |
| 62  | Unmutated | 31   | 50 | WT         | WT    | WT    | WT | SMIPS |
| 63  | Unmutated | 73   | NA | NV         | WT    | NV    | WT | EV    |
| 64  | NA        | 86   | NA | NV         | WT    | WT    | WT | SMIPS |
| 65  | NA        | 100  | NA | WT         | WT    | WT    | WT | SMIPS |
| 66  | NA        | 21   | 86 | WT         | WT    | WT    | WT | EV    |
| 67  | Unmutated | 2    | 70 | WT         | WT    | WT    | WT | SMIPS |
| 68  | Unmutated | 60   | 97 | NV         | NV    | WT    | WT | SMIPS |
| 69  | Unmutated | 60   | NA | P2515Rfs*4 | WT    | NV    | WT | SMIPS |
| 70  | Unmutated | 51   | NA | WT         | WT    | WT    | WT | SMIPS |
| 71  | Mutated   | 10   | NA | WT         | WT    | WT    | WT | SMIPS |
| 72  | Mutated   | 14   | NA | NV         | WT    | WT    | WT | SMIPS |
| 73  | Unmutated | 30   | NA | P2515Rfs*4 | WT    | NV    | NV | SMIPS |
| 74  | Mutated   | 3    | 0  | WT         | WT    | WT    | WT | SMIPS |
| 75  | Mutated   | 4    | 14 | WT         | WT    | WT    | WT | SMIPS |
| 76  | NA        | 2    | NA | P2515Rfs*4 | WT    | NV    | WT | SMIPS |
| 77  | Mutated   | NA   | NA | WT         | WT    | NV    | WT | SMIPS |
| 78  | Unmutated | 56   | 95 | NV         | WT    | NV    | NV | EV    |
| 79  | Unmutated | 78   | NA | P2515Rfs*4 | WT    | WT    | WT | SMIPS |
| 80  | NA        | 43   | 90 | WT         | WT    | WT    | WT | SMIPS |
| 81  | Unmutated | 45   | NA | WT         | WT    | WT    | WT | SMIPS |
| 82  | Unmutated | 39   | NA | WT         | WT    | WT    | WT | SMIPS |
| 83  | Unmutated | 64   | 74 | WT         | WT    | WT    | WT | SMIPS |
| 84  | Unmutated | 30   | NA | P2515Rfs*4 | WT    | WT    | WT | SMIPS |
| 85  | Unmutated | 64   | NA | WT         | WT    | WT    | WT | SMIPS |
| 86  | Unmutated | 16   | 67 | WT         | WT    | WT    | WT | SMIPS |
| 87  | Unmutated | 15   | 2  | WT         | WT    | WT    | WT | SMIPS |
| 88  | Unmutated | 4    | NA | WT         | WT    | WT    | WT | SMIPS |
| 89  | Unmutated | 49   | 60 | NV         | WT    | NV    | NV | SMIPS |
| 90  | Mutated   | 0.5  | 0  | NV         | WT    | WT    | WT | SMIPS |
| 91  | Mutated   | 6    | 13 | NV         | WT    | WT    | WT | SMIPS |
| 92  | Mutated   | 0    | 0  | NV         | WT    | WT    | WT | SMIPS |
| 93  | Unmutated | 71   | 97 | P2515Rfs*4 | WT    | E571G | WT | SMIPS |
| 94  | Mutated   | 10   | 3  | NV         | WT    | WT    | WT | SMIPS |
| 95  | Mutated   | 0.3  | 46 | WT         | NV    | WT    | WT | SMIPS |
| 96  | Mutated   | 4    | 0  | WT         | WT    | WT    | WT | SMIPS |
| 97  | Unmutated | 82   | 83 | WT         | WT    | WT    | WT | SMIPS |
| 98  | Mutated   | 7    | 8  | NV         | WT    | WT    | WT | SMIPS |
| 99  | NA        | 0.5  | 5  | WT         | L265P | WT    | WT | SMIPS |
| 100 | Unmutated | 1    | 80 | WT         | WT    | WT    | WT | SMIPS |
| 101 | Unmutated | 5    | NA | NV         | WT    | WT    | WT | SMIPS |
| 102 | Mutated   | 1    | 2  | WT         | WT    | WT    | WT | SMIPS |
| 103 | Mutated   | 14   | 2  | WT         | WT    | WT    | WT | SMIPS |
| 104 | NA        | 17   | 63 | NV         | WT    | NA    | NA | SMIPS |
| 105 | Mutated   | 2    | 1  | NV         | WT    | WT    | WT | SMIPS |
| 106 | Unmutated | 42   | 19 | WT         | WT    | WT    | WT | SMIPS |
| 107 | Unmutated | 86   | 28 | NV         | WT    | WT    | WT | SMIPS |
| 108 | Unmutated | 6    | 37 | NV         | WT    | WT    | WT | EV    |
| 109 | Unmutated | 73   | 81 | P2515Rfs*4 | WT    | WT    | WT | SMIPS |
| 110 | Unmutated | 4    | 74 | WT         | WT    | WT    | WT | SMIPS |
| 111 | Mutated   | 4    | 0  | WT         | WT    | WT    | WT | SMIPS |
| 112 | Unmutated | 24   | 87 | WT         | WT    | WT    | WT | SMIPS |
| 113 | Mutated   | 51.5 | NA | WT         | WT    | WT    | WT | SMIPS |
| 114 | Unmutated | 8    | 99 | WT         | WT    | WT    | WT | SMIPS |
| 115 | Mutated   | 7    | 14 | NV         | WT    | NA    | NA | SMIPS |
| 116 | Mutated   | 18   | 10 | NV         | WT    | WT    | WT | SMIPS |
| 117 | Unmutated | 48   | 90 | WT         | WT    | WT    | WT | SMIPS |
| 118 | Mutated   | 2    | 4  | WT         | WT    | WT    | WT | SMIPS |
| 119 | Mutated   | 14   | 7  | WT         | WT    | WT    | WT | SMIPS |
| 120 | Mutated   | 0    | 0  | WT         | WT    | WT    | WT | SMIPS |

|     |           |     |     |            |       |       |                  |       |
|-----|-----------|-----|-----|------------|-------|-------|------------------|-------|
| 121 | Unmutated | 0   | 0   | WT         | WT    | WT    | WT               | SMIPS |
| 122 | Unmutated | 0   | 0   | WT         | WT    | WT    | WT               | SMIPS |
| 123 | Mutated   | 0   | 54  | NV         | WT    | WT    | WT               | SMIPS |
| 124 | Unmutated | 0   | 13  | WT         | WT    | WT    | WT               | SMIPS |
| 125 | Unmutated | 0   | 0   | WT         | WT    | WT    | WT               | SMIPS |
| 126 | NA        | 1   | 1.5 | NV         | WT    | WT    | WT               | SMIPS |
| 127 | Mutated   | 1   | 14  | WT         | WT    | WT    | L58P, T64A, Q81P | SMIPS |
| 128 | Mutated   | 0   | 1   | NV         | WT    | WT    | WT               | SMIPS |
| 129 | Mutated   | 60  | 78  | P2515Rfs*4 | WT    | WT    | WT               | SMIPS |
| 130 | Mutated   | 6   | 5   | WT         | WT    | WT    | WT               | SMIPS |
| 131 | Unmutated | 84  | 90  | NV         | WT    | WT    | WT               | SMIPS |
| 132 | Mutated   | 74  | 12  | NV         | WT    | WT    | WT               | SMIPS |
| 133 | Mutated   | 13  | 2   | NV         | WT    | WT    | WT               | SMIPS |
| 134 | Unmutated | 33  | 38  | WT         | WT    | WT    | WT               | SMIPS |
| 135 | Mutated   | 1.5 | 2   | WT         | WT    | NA    | NA               | EV    |
| 136 | Mutated   | 4   | 5   | WT         | WT    | NA    | NA               | EV    |
| 137 | NA        | 3   | NA  | NA         | WT    | NA    | NA               | EV    |
| 138 | Mutated   | 3   | 0   | WT         | WT    | NA    | NA               | EV    |
| 139 | Mutated   | 4   | 2   | WT         | WT    | NA    | NA               | EV    |
| 140 | Mutated   | 1.5 | 3   | WT         | WT    | NA    | NA               | EV    |
| 141 | Unmutated | 41  | 14  | WT         | WT    | NA    | NA               | EV    |
| 142 | Mutated   | NA  | 94  | WT         | WT    | NA    | NA               | EV    |
| 143 | Mutated   | 4   | 2   | WT         | L265P | NA    | NA               | EV    |
| 144 | Unmutated | 18  | 21  | NV         | WT    | NA    | NA               | EV    |
| 145 | Unmutated | 70  | 30  | P2515Rfs*4 | WT    | NA    | NA               | EV    |
| 146 | Mutated   | 1   | 0   | WT         | NV    | NA    | NA               | EV    |
| 147 | Unmutated | 26  | 10  | NV         | WT    | NA    | NA               | EV    |
| 148 | Mutated   | 14  | 97  | WT         | NV    | NA    | NA               | EV    |
| 149 | Unmutated | 14  | 1   | WT         | WT    | NA    | NA               | EV    |
| 150 | Mutated   | 17  | 5   | NV         | WT    | NA    | NA               | EV    |
| 151 | Mutated   | 0.3 | 0   | WT         | WT    | NA    | NA               | EV    |
| 152 | Mutated   | 4   | 0   | WT         | NV    | NA    | NA               | EV    |
| 153 | Mutated   | 14  | 4   | WT         | WT    | NA    | NA               | EV    |
| 154 | Mutated   | 1   | 15  | WT         | WT    | NA    | NA               | EV    |
| 155 | Unmutated | 77  | 62  | WT         | WT    | WT    | NV               | SMIPS |
| 156 | Mutated   | 78  | 98  | WT         | WT    | WT    | WT               | SMIPS |
| 157 | Mutated   | 0   | 0   | NV         | WT    | WT    | NV               | SMIPS |
| 158 | Unmutated | NA  | 100 | WT         | WT    | E571K | WT               | SMIPS |
| 159 | Unmutated | NA  | 5   | WT         | WT    | WT    | WT               | SMIPS |
| 160 | Unmutated | 0   | 0   | P2515Rfs*4 | WT    | WT    | WT               | SMIPS |
| 161 | Unmutated | 80  | NA  | WT         | WT    | WT    | NV               | SMIPS |
| 162 | Mutated   | 0   | 0   | WT         | WT    | WT    | NV               | SMIPS |
| 163 | Unmutated | NA  | NA  | WT         | WT    | WT    | NV               | SMIPS |
| 164 | Unmutated | 0   | 0   | WT         | WT    | WT    | WT               | SMIPS |
| 165 | Unmutated | NA  | NA  | NV         | WT    | WT    | WT               | SMIPS |
| 166 | Unmutated | 20  | NA  | WT         | WT    | WT    | WT               | SMIPS |
| 167 | Mutated   | NA  | NA  | WT         | WT    | WT    | WT               | EV    |
| 168 | Unmutated | 0   | 0   | NV         | WT    | WT    | WT               | SMIPS |
| 169 | NA        | NA  | NA  | WT         | WT    | WT    | WT               | SMIPS |
| 170 | Unmutated | NA  | NA  | NV         | WT    | WT    | WT               | SMIPS |
| 171 | Unmutated | 0   | 48  | WT         | WT    | WT    | WT               | SMIPS |
| 172 | Mutated   | NA  | NA  | NV         | WT    | WT    | WT               | SMIPS |
| 173 | Unmutated | NA  | NA  | WT         | WT    | E571K | WT               | SMIPS |
| 174 | Unmutated | NA  | 0   | NV         | WT    | WT    | WT               | SMIPS |
| 175 | Unmutated | NA  | NA  | WT         | WT    | WT    | WT               | EV    |
| 176 | Unmutated | NA  | 0   | NV         | WT    | WT    | WT               | SMIPS |
| 177 | Unmutated | NA  | NA  | NV         | WT    | WT    | WT               | SMIPS |
| 178 | Mutated   | NA  | 9   | WT         | NV    | WT    | WT               | EV    |
| 179 | Mutated   | 3   | 5   | WT         | WT    | NA    | NA               | EV    |
| 180 | Unmutated | 9   | 8   | WT         | WT    | NA    | NA               | EV    |
| 181 | NA        | 8   | 0   | NA         | WT    | NA    | NA               | EV    |
| 182 | Unmutated | 11  | 1   | NA         | NV    | NA    | NA               | EV    |

|     |           |      |      |            |       |    |    |       |
|-----|-----------|------|------|------------|-------|----|----|-------|
| 183 | Unmutated | 25   | 98   | NV         | L265P | WT | WT | SMIPS |
| 184 | Mutated   | 14   | 5    | NV         | NV    | NA | NA | EV    |
| 185 | NA        | 2    | 26   | NV         | NV    | NA | NA | EV    |
| 186 | Mutated   | NA   | 15   | NV         | NV    | NA | NA | EV    |
| 187 | NA        | 37   | 0    | NV         | NV    | NA | NA | EV    |
| 188 | NA        | 1    | 0    | NV         | NV    | NA | NA | EV    |
| 189 | Unmutated | 37   | 8    | WT         | WT    | WT | WT | SMIPS |
| 190 | Mutated   | 0.9  | 0.35 | NV         | WT    | WT | WT | SMIPS |
| 191 | Mutated   | NA   | NA   | WT         | WT    | NA | NA | EV    |
| 192 | Mutated   | NA   | NA   | WT         | NV    | NA | NA | EV    |
| 193 | NA        | 5.5  | NA   | WT         | NV    | NA | NA | EV    |
| 194 | Mutated   | NA   | NA   | WT         | WT    | NA | NA | EV    |
| 195 | Mutated   | NA   | NA   | WT         | WT    | NA | NA | EV    |
| 196 | Mutated   | 4    | 0    | NA         | WT    | NA | NA | EV    |
| 197 | Mutated   | NA   | NA   | WT         | WT    | NA | NA | EV    |
| 198 | Mutated   | NA   | NA   | WT         | WT    | NA | NA | EV    |
| 199 | NA        | NA   | NA   | WT         | NV    | NA | NA | EV    |
| 200 | Unmutated | 70   | 40   | WT         | WT    | NA | NA | EV    |
| 201 | Unmutated | NA   | NA   | P2515Rfs*4 | NV    | NA | NA | EV    |
| 202 | NA        | NA   | NA   | WT         | NV    | NA | NA | EV    |
| 203 | NA        | NA   | NA   | NV         | NV    | NA | NA | EV    |
| 204 | Mutated   | NA   | NA   | NA         | NV    | NA | NA | EV    |
| 205 | Unmutated | 12   | NA   | WT         | WT    | NA | NA | EV    |
| 206 | Unmutated | NA   | NA   | F2482Ffs*2 | WT    | NA | NA | EV    |
| 207 | Mutated   | 7    | NA   | WT         | WT    | NA | NA | EV    |
| 208 | NA        | NA   | NA   | WT         | WT    | NA | NA | EV    |
| 209 | Unmutated | NA   | NA   | WT         | NV    | NA | NA | EV    |
| 210 | NA        | NA   | NA   | WT         | WT    | NA | NA | EV    |
| 211 | NA        | NA   | NA   | WT         | NV    | NA | NA | EV    |
| 212 | NA        | NA   | NA   | WT         | NV    | NA | NA | EV    |
| 213 | Mutated   | 1.7  | 6    | NA         | NV    | NA | NA | EV    |
| 214 | NA        | 24   | 100  | NV         | WT    | NA | NA | EV    |
| 215 | NA        | NA   | NA   | NV         | WT    | NA | NA | EV    |
| 216 | NA        | 27   | 57   | WT         | WT    | NA | NA | EV    |
| 217 | NA        | NA   | NA   | WT         | NV    | NA | NA | EV    |
| 218 | Unmutated | 56   | NA   | WT         | WT    | NA | NA | EV    |
| 219 | NA        | NA   | NA   | NA         | WT    | NA | NA | EV    |
| 220 | NA        | 1.7  | 0    | WT         | WT    | NA | NA | EV    |
| 221 | NA        | NA   | NA   | WT         | WT    | NA | NA | EV    |
| 222 | Unmutated | NA   | NA   | P2515Rfs*4 | WT    | NA | NA | EV    |
| 223 | NA        | NA   | NA   | WT         | WT    | NA | NA | EV    |
| 224 | NA        | NA   | NA   | NV         | WT    | NA | NA | EV    |
| 225 | Unmutated | 6    | NA   | NV         | NV    | NA | NA | EV    |
| 226 | Mutated   | 25   | 2    | WT         | WT    | WT | WT | SMIPS |
| 227 | Unmutated | NA   | NA   | P2515Rfs*4 | WT    | NA | NA | EV    |
| 228 | NA        | NA   | NA   | WT         | WT    | NA | NA | EV    |
| 229 | Mutated   | 41.5 | NA   | NV         | WT    | NA | NA | EV    |
| 230 | NA        | 0    | NA   | NA         | NV    | NA | NA | EV    |
| 231 | NA        | 1    | 3    | WT         | WT    | NA | NA | EV    |
| 232 | NA        | 17   | NA   | WT         | WT    | NA | NA | EV    |
| 233 | Unmutated | 9    | 6    | WT         | WT    | NA | NA | EV    |
| 234 | Unmutated | 46   | NA   | WT         | WT    | NA | NA | EV    |
| 235 | Mutated   | 1    | 1    | NA         | WT    | NA | NA | EV    |
| 236 | Mutated   | NA   | NA   | WT         | WT    | NA | NA | EV    |
| 237 | Mutated   | 3    | 70   | NA         | WT    | NA | NA | EV    |
| 238 | Mutated   | 0    | 52   | P2515Rfs*4 | WT    | NA | NA | EV    |
| 239 | NA        | NA   | NA   | P2515Rfs*4 | WT    | NA | NA | EV    |
| 240 | Mutated   | 1    | 100  | NA         | WT    | NA | NA | EV    |
| 241 | Mutated   | NA   | NA   | WT         | NV    | NA | NA | EV    |
| 242 | Mutated   | 2    | 98   | NA         | WT    | NA | NA | EV    |
| 243 | Mutated   | 10.5 | NA   | WT         | WT    | NA | NA | EV    |
| 244 | NA        | 0.5  | 3    | NV         | WT    | NA | NA | EV    |

|     |           |     |    |            |       |    |    |       |
|-----|-----------|-----|----|------------|-------|----|----|-------|
| 245 | NA        | NA  | NA | WT         | WT    | NA | NA | EV    |
| 246 | Unmutated | NA  | NA | WT         | WT    | NA | NA | EV    |
| 247 | Mutated   | 4   | 1  | NA         | WT    | NA | NA | EV    |
| 248 | Unmutated | NA  | NA | Q2503*     | WT    | NA | NA | EV    |
| 249 | Mutated   | 3   | 9  | WT         | WT    | WT | WT | SMIPS |
| 250 | Mutated   | NA  | NA | WT         | WT    | NA | NA | EV    |
| 251 | NA        | 36  | 8  | WT         | WT    | NA | NA | EV    |
| 252 | NA        | 45  | NA | NA         | NV    | NA | NA | EV    |
| 253 | Unmutated | 10  | NA | NA         | WT    | NA | NA | EV    |
| 254 | NA        | NA  | NA | WT         | WT    | NA | NA | EV    |
| 255 | Mutated   | 2   | 3  | WT         | WT    | NA | NA | EV    |
| 256 | Unmutated | 34  | 34 | WT         | WT    | NA | NA | EV    |
| 257 | Mutated   | NA  | NA | WT         | WT    | NA | NA | EV    |
| 258 | Mutated   | 4   | 25 | P2515Rfs*4 | WT    | NA | NA | EV    |
| 259 | NA        | 14  | 4  | WT         | WT    | NA | NA | EV    |
| 260 | Unmutated | 29  | NA | WT         | WT    | NA | NA | EV    |
| 261 | Unmutated | NA  | NA | WT         | WT    | NA | NA | EV    |
| 262 | Mutated   | 2   | 1  | WT         | WT    | NA | NA | EV    |
| 263 | NA        | 2   | 57 | NV         | WT    | NA | NA | EV    |
| 264 | Mutated   | 6   | 3  | NA         | WT    | NA | NA | EV    |
| 265 | Mutated   | 19  | NA | WT         | WT    | NA | NA | EV    |
| 266 | NA        | 2   | 0  | WT         | WT    | NA | NA | EV    |
| 267 | Unmutated | 94  | NA | WT         | WT    | NA | NA | EV    |
| 268 | Mutated   | 1   | NA | WT         | WT    | NA | NA | EV    |
| 269 | NA        | NA  | 89 | WT         | WT    | NA | NA | EV    |
| 270 | NA        | 4   | NA | NA         | WT    | NA | NA | EV    |
| 271 | Unmutated | 29  | NA | NA         | WT    | NA | NA | EV    |
| 272 | Mutated   | 13  | NA | WT         | WT    | NA | NA | EV    |
| 273 | NA        | 26  | NA | WT         | WT    | NA | NA | EV    |
| 274 | NA        | 69  | NA | WT         | WT    | NA | NA | EV    |
| 275 | NA        | 0.5 | 1  | NA         | NV    | NA | NA | EV    |
| 276 | Mutated   | 2   | 3  | WT         | L265P | NA | NA | EV    |
| 277 | Mutated   | 0   | NA | NA         | NV    | NA | NA | EV    |
| 278 | NA        | 87  | NA | WT         | WT    | NA | NA | EV    |
| 279 | NA        | NA  | NA | WT         | WT    | NA | NA | EV    |
| 280 | Unmutated | 80  | NA | NV         | WT    | NA | NA | EV    |
| 281 | NA        | NA  | NA | WT         | WT    | NA | NA | EV    |
| 282 | NA        | NA  | NA | WT         | WT    | NA | NA | EV    |
| 283 | NA        | NA  | NA | NV         | NV    | NA | NA | EV    |
| 284 | NA        | NA  | NA | NA         | WT    | NA | NA | EV    |
| 285 | Mutated   | NA  | NA | NA         | WT    | NA | NA | EV    |
| 286 | Unmutated | 83  | 67 | NA         | WT    | NA | NA | EV    |
| 287 | Unmutated | NA  | NA | WT         | WT    | NA | NA | EV    |
| 288 | Mutated   | NA  | NA | WT         | WT    | NA | NA | EV    |
| 289 | Unmutated | 54  | NA | WT         | WT    | NA | NA | EV    |
| 290 | NA        | NA  | NA | WT         | WT    | NA | NA | EV    |
| 291 | NA        | NA  | NA | WT         | WT    | NA | NA | EV    |
| 292 | NA        | NA  | NA | NV         | WT    | NA | NA | EV    |
| 293 | NA        | NA  | NA | WT         | WT    | NA | NA | EV    |
| 294 | Unmutated | 16  | 17 | WT         | WT    | NA | NA | EV    |
| 295 | Mutated   | 15  | 2  | WT         | WT    | NA | NA | EV    |
| 296 | Mutated   | 13  | 0  | WT         | NV    | NA | NA | EV    |
| 297 | NA        | 1   | NA | NA         | NV    | NA | NA | EV    |
| 298 | Unmutated | 43  | NA | P2515Rfs*4 | WT    | NA | NA | EV    |
| 299 | NA        | 0   | NA | WT         | NV    | NA | NA | EV    |
| 300 | Mutated   | 7   | 1  | WT         | NV    | NA | NA | EV    |
| 301 | Mutated   | 53  | 10 | WT         | WT    | NA | NA | EV    |
| 302 | Unmutated | 3   | NA | P2515Rfs*4 | NV    | NA | NA | EV    |
| 303 | Mutated   | 16  | NA | NA         | WT    | NA | NA | EV    |
| 304 | Mutated   | 0   | 26 | NA         | WT    | NA | NA | EV    |
| 305 | NA        | 91  | NA | WT         | WT    | NA | NA | EV    |
| 306 | Mutated   | 1   | NA | WT         | NV    | NA | NA | EV    |

|     |           |      |    |            |       |    |    |       |
|-----|-----------|------|----|------------|-------|----|----|-------|
| 307 | Unmutated | 88   | NA | WT         | WT    | NA | NA | EV    |
| 308 | Mutated   | 0.4  | NA | NV         | WT    | NA | NA | EV    |
| 309 | Unmutated | 14   | NA | WT         | WT    | NA | NA | EV    |
| 310 | Mutated   | 6    | 5  | WT         | NV    | NA | NA | EV    |
| 311 | Unmutated | 11   | NA | P2515Rfs*4 | NV    | NA | NA | EV    |
| 312 | Unmutated | 7    | NA | WT         | NV    | NA | NA | EV    |
| 313 | NA        | 3    | NA | NA         | NV    | NA | NA | EV    |
| 314 | Mutated   | 3    | 1  | WT         | WT    | NA | NA | EV    |
| 315 | Unmutated | 10   | 80 | WT         | NV    | NA | NA | EV    |
| 316 | NA        | 0.2  | 0  | WT         | WT    | NA | NA | EV    |
| 317 | Unmutated | 34   | NA | WT         | WT    | NA | NA | EV    |
| 318 | Mutated   | 1    | 6  | P2515Rfs*4 | NV    | NA | NA | EV    |
| 319 | NA        | 59   | 22 | WT         | NV    | NA | NA | EV    |
| 320 | Mutated   | 6.5  | 7  | WT         | NV    | NA | NA | EV    |
| 321 | NA        | 56   | NA | WT         | WT    | NA | NA | EV    |
| 322 | Unmutated | 30   | 36 | P2515Rfs*4 | WT    | NA | NA | EV    |
| 323 | NA        | 59   | NA | WT         | WT    | NA | NA | EV    |
| 324 | Mutated   | 12   | NA | WT         | WT    | NA | NA | EV    |
| 325 | Unmutated | 31.5 | NA | WT         | WT    | NA | NA | EV    |
| 326 | Mutated   | NA   | NA | NV         | NV    | NA | NA | EV    |
| 327 | Mutated   | 6    | 0  | WT         | WT    | NA | NA | EV    |
| 328 | Unmutated | 70   | NA | P2515Rfs*4 | NV    | NA | NA | EV    |
| 329 | NA        | NA   | NA | NV         | WT    | NA | NA | EV    |
| 330 | Unmutated | 70   | NA | WT         | WT    | NA | NA | EV    |
| 331 | NA        | NA   | NA | NA         | NV    | NA | NA | EV    |
| 332 | Mutated   | 5    | NA | WT         | WT    | NA | NA | EV    |
| 333 | NA        | NA   | NA | NV         | WT    | NA | NA | EV    |
| 334 | Mutated   | 21.5 | 7  | WT         | WT    | NA | NA | EV    |
| 335 | Unmutated | 1.5  | 2  | WT         | WT    | NA | NA | EV    |
| 336 | Mutated   | 25   | NA | WT         | NV    | NA | NA | EV    |
| 337 | Unmutated | 39   | NA | WT         | WT    | NA | NA | EV    |
| 338 | Unmutated | 35   | NA | WT         | WT    | NA | NA | EV    |
| 339 | Unmutated | 1    | 2  | WT         | NV    | NA | NA | EV    |
| 340 | Mutated   | 6.5  | 1  | WT         | WT    | NA | NA | EV    |
| 341 | Mutated   | 3    | 1  | NV         | L265P | NA | NA | EV    |
| 342 | Mutated   | 6    | NA | WT         | WT    | NA | NA | EV    |
| 343 | Unmutated | 73   | NA | WT         | WT    | NA | NA | EV    |
| 344 | NA        | 61   | NA | WT         | WT    | WT | WT | SMIPS |
| 345 | Unmutated | 73   | 78 | WT         | WT    | WT | WT | SMIPS |
| 346 | Mutated   | 17   | 0  | NV         | WT    | WT | WT | SMIPS |
| 347 | Mutated   | 1    | 2  | NV         | WT    | NV | WT | SMIPS |
| 348 | Mutated   | 29   | 26 | WT         | WT    | WT | WT | SMIPS |
| 349 | Mutated   | 22   | 83 | P2515Rfs*4 | WT    | WT | WT | SMIPS |
| 350 | NA        | NA   | NA | WT         | WT    | WT | WT | SMIPS |
| 351 | Unmutated | 55   | 97 | NV         | WT    | WT | WT | SMIPS |
| 352 | Mutated   | 14   | 28 | NV         | WT    | WT | NV | SMIPS |
| 353 | Unmutated | 73   | 21 | NV         | WT    | WT | WT | SMIPS |
| 354 | Mutated   | 2    | 2  | WT         | WT    | NA | NA | SMIPS |
| 355 | Unmutated | 8    | 47 | WT         | WT    | WT | WT | SMIPS |
| 356 | Mutated   | 14   | 3  | NV         | L265P | WT | WT | SMIPS |
| 357 | Mutated   | 10   | 6  | NV         | WT    | NV | WT | EV    |
| 358 | Unmutated | 43   | 1  | NV         | WT    | WT | WT | SMIPS |
| 359 | Unmutated | 5    | 2  | WT         | WT    | WT | WT | SMIPS |
| 360 | Unmutated | 39   | 42 | NV         | WT    | WT | WT | SMIPS |
| 361 | Mutated   | 1    | 5  | WT         | WT    | WT | WT | SMIPS |
| 362 | Mutated   | 0    | 0  | WT         | WT    | WT | WT | SMIPS |
| 363 | Mutated   | 3    | 0  | WT         | WT    | WT | WT | SMIPS |

**Supplementary Table 9. Differentially expressed genes between CLL cases with NOTCH1-mutations or not.**

| Gene symbol | Probe set    | Signal NOTCH1-unmutated | Signal NOTCH1-mutated | Fold-change |
|-------------|--------------|-------------------------|-----------------------|-------------|
| TUBB6       | 209191_at    | 44.34                   | 207.12                | 0.21        |
| LAG3        | 206486_at    | 38.71                   | 164.28                | 0.24        |
| LTK         | 217184_s_at  | 43.91                   | 179.84                | 0.24        |
| MGC24125    | 1554733_at   | 13.85                   | 51.73                 | 0.27        |
|             | 1554732_at   | 15.3                    | 32.17                 | 0.48        |
| MSI2        | 1552364_s_at | 37.9                    | 139.68                | 0.27        |
|             | 225238_at    | 112.27                  | 343.28                | 0.33        |
|             | 243010_at    | 93.88                   | 245.51                | 0.38        |
|             | 225237_s_at  | 447.29                  | 949.61                | 0.47        |
|             | 225240_s_at  | 884.52                  | 1619.29               | 0.55        |
| SFTPB       | 209810_at    | 103.45                  | 336.95                | 0.31        |
|             | 37004_at     | 44.47                   | 123.97                | 0.36        |
|             | 214354_x_at  | 49.6                    | 69.32                 | 0.72        |
| DNASE1L3    | 205554_s_at  | 13.59                   | 42.96                 | 0.32        |
| LGALS1      | 201105_at    | 543.76                  | 1637.77               | 0.33        |
| YES1        | 202932_at    | 12.94                   | 37.75                 | 0.34        |
| PDZD2       | 209493_at    | 7.95                    | 21.87                 | 0.36        |
| ZAP70       | 1555613_a_at | 73.41                   | 193.03                | 0.38        |
| ATF5        | 204999_s_at  | 52.73                   | 132.42                | 0.4         |
|             | 204998_s_at  | 99.24                   | 246.62                | 0.4         |
| CRIP1       | 205081_at    | 938.51                  | 2357.79               | 0.4         |
| EPPK1       | 232165_at    | 13.44                   | 32.24                 | 0.42        |
|             | 232164_s_at  | 10.19                   | 20.75                 | 0.49        |
| PAK1        | 209615_s_at  | 12.75                   | 30.05                 | 0.42        |
| TTC39B      | 232000_at    | 8.17                    | 19.3                  | 0.42        |
|             | 242477_at    | 12.07                   | 18.73                 | 0.64        |
|             | 236826_at    | 10.01                   | 12.88                 | 0.78        |
| UCP2        | 208997_s_at  | 235.15                  | 545.39                | 0.43        |
| ENTPD1      | 209474_s_at  | 50.53                   | 113.77                | 0.44        |
|             | 207691_x_at  | 64.51                   | 122.03                | 0.53        |
| FARP1       | 201911_s_at  | 16.73                   | 37.75                 | 0.44        |
| ITGA4       | 205884_at    | 10.31                   | 23.49                 | 0.44        |
| TMEM231     | 64900_at     | 19.36                   | 44.19                 | 0.44        |
| TNFRSF1B    | 203508_at    | 271.04                  | 618.25                | 0.44        |
| NFKBID      | 1553042_a_at | 111.43                  | 245.08                | 0.45        |
|             | 230052_s_at  | 283.88                  | 591.72                | 0.48        |
| RAB40B      | 204547_at    | 41.99                   | 90.93                 | 0.46        |
| RIMKLB      | 225978_at    | 20.17                   | 44.11                 | 0.46        |
| EFCAB4A     | 227429_at    | 54.11                   | 115.3                 | 0.47        |
| LARP1       | 212193_s_at  | 34.04                   | 72.88                 | 0.47        |
|             | 210966_x_at  | 85.1                    | 133.37                | 0.64        |
| SNRNP25     | 218493_at    | 276.73                  | 594.32                | 0.47        |
| DTX1        | 227336_at    | 82.74                   | 171.72                | 0.48        |
| PFN1        | 200634_at    | 504.91                  | 1041.98               | 0.48        |
| PRKACB      | 235780_at    | 15.15                   | 31.6                  | 0.48        |
| CD79A       | 1555779_a_at | 428.86                  | 874.11                | 0.49        |
|             | 205049_s_at  | 682.6                   | 1283.38               | 0.53        |
| FLNB        | 208613_s_at  | 36.01                   | 73.31                 | 0.49        |
|             | 208614_s_at  | 156.53                  | 300.65                | 0.52        |
| MYO6        | 203216_s_at  | 7.9                     | 16.25                 | 0.49        |
| PEA15       | 200787_s_at  | 53.35                   | 109.07                | 0.49        |
|             | 200788_s_at  | 364.29                  | 592.14                | 0.62        |
| GRN         | 216041_x_at  | 332.42                  | 660.66                | 0.499       |
|             | 200678_x_at  | 353.81                  | 705.61                | 0.51        |
|             | 211284_s_at  | 232.02                  | 448.24                | 0.51        |
| MLF2        | 200948_at    | 84.33                   | 167.01                | 0.5         |
| PVT1        | 1558290_a_at | 156.62                  | 310.96                | 0.5         |
| AICDA       | 224499_s_at  | 7.72                    | 15.21                 | 0.51        |
| AKIRIN2     | 223143_s_at  | 32.73                   | 63.61                 | 0.51        |
| AP2M1       | 200613_at    | 161.41                  | 315.46                | 0.51        |
| CFL1        | 1555730_a_at | 332.58                  | 652.95                | 0.51        |
|             | 200021_at    | 3958.73                 | 4963.32               | 0.8         |
| FKBP1A      | 214119_s_at  | 71.9                    | 141.25                | 0.51        |
|             | 210186_s_at  | 53.11                   | 97.58                 | 0.54        |
|             | 200709_at    | 109.15                  | 175.38                | 0.62        |
| PKM2        | 201251_at    | 52.76                   | 103.81                | 0.51        |
| TRAPPC1     | 225294_s_at  | 31.9                    | 62.05                 | 0.51        |
| BANF1       | 210125_s_at  | 79.07                   | 152.98                | 0.52        |
| DAZAP2      | 212595_s_at  | 813.93                  | 1562.21               | 0.52        |
| DOK3        | 223553_s_at  | 133.23                  | 258.44                | 0.52        |

|             |              |        |         |      |
|-------------|--------------|--------|---------|------|
| MX1         | 202086_at    | 395.32 | 754.44  | 0.52 |
| NAPA        | 208751_at    | 19.01  | 36.84   | 0.52 |
|             | 206491_s_at  | 66.76  | 95.7    | 0.7  |
| CTSB        | 213274_s_at  | 23.71  | 44.32   | 0.53 |
|             | 200838_at    | 116.45 | 200.44  | 0.58 |
|             | 200839_s_at  | 225.24 | 349     | 0.65 |
| <b>DTX4</b> | 212611_at    | 127.99 | 239.52  | 0.53 |
| NMB         | 205204_at    | 106.18 | 201.89  | 0.53 |
| WSB2        | 201760_s_at  | 706.11 | 1328.98 | 0.53 |
| ASNA1       | 202024_at    | 69.83  | 129.57  | 0.54 |
| CLN8        | 222874_s_at  | 29.36  | 54.54   | 0.54 |
|             | 219340_s_at  | 59.82  | 98.06   | 0.61 |
| COPE        | 201264_at    | 165.28 | 306.93  | 0.54 |
| DRAP1       | 203258_at    | 83.38  | 154.16  | 0.54 |
| NINJ2       | 219594_at    | 27.33  | 50.8    | 0.54 |
| PLEKHG2     | 225979_at    | 20.23  | 37.37   | 0.54 |
| PPP1R9B     | 225124_at    | 73.26  | 136.37  | 0.54 |
| PPP2R1A     | 200695_at    | 87.55  | 161.77  | 0.54 |
| SH3GLB2     | 218813_s_at  | 47.99  | 88.89   | 0.54 |
|             | 224907_s_at  | 46.72  | 70.1    | 0.67 |
| UBA1        | 200964_at    | 244.82 | 455.28  | 0.54 |
| ATP2A3      | 213042_s_at  | 35.54  | 65.17   | 0.55 |
|             | 207521_s_at  | 36.76  | 59.55   | 0.62 |
| CLPTM1      | 211136_s_at  | 65.45  | 119.22  | 0.55 |
|             | 201640_x_at  | 104.77 | 142.47  | 0.74 |
| COPZ1       | 222386_s_at  | 154.59 | 278.83  | 0.55 |
| CYB5R3      | 1554574_a_at | 36.21  | 66.26   | 0.55 |
| GALNT2      | 217787_s_at  | 75.6   | 137.95  | 0.55 |
| HOMER2      | 217080_s_at  | 18.43  | 33.65   | 0.55 |
| RNF41       | 201962_s_at  | 354.59 | 645.37  | 0.55 |
|             | 201961_s_at  | 121.25 | 219.7   | 0.55 |
| TMED2       | 204426_at    | 121.11 | 219.61  | 0.55 |
|             | 204427_s_at  | 286.87 | 488.41  | 0.59 |
| ZMAT3       | 219628_at    | 104.92 | 192.12  | 0.55 |
|             | 1555609_a_at | 12.97  | 17.74   | 0.73 |
| ARID1A      | 210649_s_at  | 97.37  | 175.18  | 0.56 |
| COMMD4      | 209132_s_at  | 77.91  | 139.78  | 0.56 |
|             | 206441_s_at  | 114.91 | 171.78  | 0.67 |
| DCTN1       | 201082_s_at  | 24.49  | 44.03   | 0.56 |
| DDA1        | 218260_at    | 59.6   | 106.16  | 0.56 |
| DGKA        | 211272_s_at  | 94.9   | 170.74  | 0.56 |
| IL2RG       | 204116_at    | 123.58 | 221.71  | 0.56 |
| OGDH        | 201282_at    | 97.45  | 172.69  | 0.56 |
| PSME3       | 209852_x_at  | 97.95  | 176.22  | 0.56 |
| VAMP5       | 204929_s_at  | 83.47  | 149.9   | 0.56 |
| ABHD6       | 45288_at     | 15.05  | 26.19   | 0.57 |
|             | 221679_s_at  | 8.62   | 13.32   | 0.65 |
| AP1M1       | 223025_s_at  | 71.09  | 125.21  | 0.57 |
| CAPNS1      | 200001_at    | 308.5  | 537.54  | 0.57 |
| CAPZB       | 201950_x_at  | 204.18 | 355.93  | 0.57 |
| CS          | 208660_at    | 577.69 | 1013.88 | 0.57 |
| EIF4E2      | 213570_at    | 79.35  | 139.2   | 0.57 |
|             | 213571_s_at  | 242.79 | 369.56  | 0.66 |
| NUCB1       | 200646_s_at  | 19.55  | 34.25   | 0.57 |
|             | 200649_at    | 57.75  | 91.1    | 0.63 |
| SEC61A2     | 228747_at    | 26.42  | 46.69   | 0.57 |
|             | 219499_at    | 60.25  | 85.71   | 0.7  |
| SGMS2       | 227038_at    | 7.46   | 13.13   | 0.57 |
| TP53I3      | 210609_s_at  | 131.05 | 229.71  | 0.57 |
| UNC93B1     | 225869_s_at  | 62.17  | 109.53  | 0.57 |
| ABCC1       | 202805_s_at  | 64.4   | 110.53  | 0.58 |
|             | 202804_at    | 492.04 | 691.14  | 0.71 |
| AKIRIN1     | 222458_s_at  | 79.87  | 137.22  | 0.58 |
| CMTM3       | 1555705_a_at | 102.64 | 176.77  | 0.58 |
| EIF5A       | 201123_s_at  | 792.77 | 1356.71 | 0.58 |
|             | 201122_x_at  | 391.91 | 566.24  | 0.69 |
|             | 213753_x_at  | 276.05 | 385.79  | 0.72 |
| MCRS1       | 202556_s_at  | 101.99 | 174.69  | 0.58 |
| MGAT4B      | 220189_s_at  | 123.86 | 212.74  | 0.58 |
| MTA1        | 202247_s_at  | 20.16  | 34.57   | 0.58 |
| PCGF1       | 210023_s_at  | 18.28  | 31.35   | 0.58 |
| PPP1CA      | 200846_s_at  | 554.29 | 949.68  | 0.58 |
| RAB5C       | 201156_s_at  | 103.27 | 179.39  | 0.58 |
|             | 201140_s_at  | 134.12 | 205.43  | 0.65 |
| ST6GALNAC4  | 221551_x_at  | 87.06  | 151.03  | 0.58 |
|             | 220937_s_at  | 193.16 | 309.44  | 0.62 |
| TLR7        | 222952_s_at  | 44.83  | 77.22   | 0.58 |



|            |              |         |         |      |
|------------|--------------|---------|---------|------|
| MAP2K2     | 213490_s_at  | 33.22   | 56.73   | 0.59 |
|            | 202424_at    | 158.17  | 259.64  | 0.61 |
| MYH10      | 212372_at    | 9.35    | 15.87   | 0.59 |
| MYL6B      | 204173_at    | 101.22  | 170.28  | 0.59 |
| NCKAP1L    | 209734_at    | 128.79  | 216.7   | 0.59 |
| NCRNA00173 | 1563369_at   | 23.8    | 40.19   | 0.59 |
| ODF3B      | 238327_at    | 40.79   | 69.64   | 0.59 |
| PRKCSH     | 200707_at    | 62.04   | 105.04  | 0.59 |
| PRR14      | 1559397_s_at | 30.02   | 51.29   | 0.59 |
| RNF130     | 217865_at    | 333.89  | 562.2   | 0.59 |
| S100A13    | 202598_at    | 155.09  | 262.26  | 0.59 |
| SPON2      | 218638_s_at  | 70.4    | 118.58  | 0.59 |
| ALOX5      | 204445_s_at  | 76.53   | 126.96  | 0.6  |
| AP2S1      | 208074_s_at  | 256.34  | 423.83  | 0.6  |
|            | 211047_x_at  | 225.03  | 371.4   | 0.61 |
|            | 202120_x_at  | 150.23  | 242.39  | 0.62 |
| BLOC1S1    | 202592_at    | 148.16  | 248.65  | 0.6  |
| CORO6      | 1552301_a_at | 25.97   | 43.01   | 0.6  |
| FBXO6      | 231769_at    | 66.48   | 110.97  | 0.6  |
| MAPK1IP1L  | 212497_at    | 42.38   | 70.23   | 0.6  |
| UBAP2L     | 201378_s_at  | 212.15  | 350.98  | 0.6  |
| ARF3       | 211622_s_at  | 43.92   | 72.18   | 0.61 |
| CALCOCO1   | 209002_s_at  | 164.22  | 271.18  | 0.61 |
| DCAF15     | 221849_s_at  | 27.8    | 45.45   | 0.61 |
| SMARCB1    | 212167_s_at  | 292.04  | 477.95  | 0.61 |
| ATP6VOB    | 200078_s_at  | 705.64  | 1137.06 | 0.62 |
| CCDC24     | 228994_at    | 70.54   | 113.59  | 0.62 |
| DEDD       | 211255_x_at  | 39.59   | 64.23   | 0.62 |
|            | 202480_s_at  | 48.62   | 65.35   | 0.74 |
| FAM89B     | 32209_at     | 167.9   | 269.66  | 0.62 |
|            | 212484_at    | 93.11   | 126.87  | 0.73 |
|            | 218074_at    | 442.36  | 573.63  | 0.77 |
| FRY        | 214318_s_at  | 31.43   | 50.82   | 0.62 |
| GAPDH      | 213453_x_at  | 2216.14 | 3581.91 | 0.62 |
|            | 217398_x_at  | 2210    | 3584.89 | 0.62 |
|            | 212581_x_at  | 2391.59 | 3799.65 | 0.63 |
| IRF9       | 203882_at    | 726.04  | 1166.29 | 0.62 |
| OS9        | 215399_s_at  | 160.31  | 257.39  | 0.62 |
|            | 200714_x_at  | 291.85  | 423.78  | 0.69 |
| P4HB       | 1564494_s_at | 44.41   | 71.57   | 0.62 |
|            | 200656_s_at  | 156.89  | 245.37  | 0.64 |
|            | 200654_at    | 460.27  | 641.09  | 0.72 |
| PSMF1      | 201052_s_at  | 109.37  | 177.23  | 0.62 |
| RFC5       | 203210_s_at  | 38.1    | 61.78   | 0.62 |
| ROGDI      | 218394_at    | 30.94   | 50.29   | 0.62 |
| TLN1       | 203254_s_at  | 43.66   | 70.55   | 0.62 |
| TRAF4      | 211899_s_at  | 23.08   | 37.11   | 0.62 |
| ATP11A     | 216488_s_at  | 49.23   | 77.99   | 0.63 |
| CBX4       | 206724_at    | 61.04   | 96.12   | 0.63 |
| CD99       | 201028_s_at  | 242.68  | 383.77  | 0.63 |
| DDX41      | 217840_at    | 243.85  | 387.11  | 0.63 |
| ERGIC1     | 223847_s_at  | 90.36   | 142.99  | 0.63 |
|            | 224577_at    | 187.25  | 281.24  | 0.67 |
| MAF1       | 222998_at    | 178.66  | 282.24  | 0.63 |
| NDST1      | 1554010_at   | 36.53   | 58.36   | 0.63 |
| PATL1      | 225468_at    | 64.35   | 101.78  | 0.63 |
|            | 235235_s_at  | 18.88   | 25.84   | 0.73 |
| PIGR       | 204213_at    | 52.32   | 82.56   | 0.63 |
| PMF1       | 202337_at    | 145.74  | 231.95  | 0.63 |
| RHBDD2     | 232053_x_at  | 63.53   | 101.03  | 0.63 |
|            | 222995_s_at  | 161.52  | 241.91  | 0.67 |
| SH3PXD2A   | 213252_at    | 47.1    | 74.86   | 0.63 |
| SRPR       | 200918_s_at  | 183.9   | 290.9   | 0.63 |
| STRN4      | 217903_at    | 50.51   | 79.98   | 0.63 |
| TFDP1      | 242939_at    | 43.11   | 67.94   | 0.63 |
|            | 204147_s_at  | 69.12   | 100.35  | 0.69 |
| THRAP3     | 217847_s_at  | 90.92   | 144.78  | 0.63 |
| WDR1       | 200611_s_at  | 451.75  | 712.16  | 0.63 |
| ARHGDI     | 213606_s_at  | 19.42   | 30.49   | 0.64 |
|            | 201168_x_at  | 157.56  | 223.54  | 0.7  |
|            | 211716_x_at  | 195.02  | 273.63  | 0.71 |
|            | 201167_x_at  | 55.73   | 76.76   | 0.73 |
| CIB1       | 201953_at    | 839.72  | 1318.07 | 0.64 |
| CREBBP     | 211808_s_at  | 48.56   | 75.66   | 0.64 |
| GNG2       | 224965_at    | 29.49   | 46.21   | 0.64 |
| IPO4       | 218305_at    | 39.96   | 62.51   | 0.64 |
| LSP1       | 203523_at    | 205.12  | 322.42  | 0.64 |

|               |              |        |         |      |
|---------------|--------------|--------|---------|------|
| MGAT1         | 201126_s_at  | 150.74 | 235.04  | 0.64 |
| MIER1         | 240227_at    | 15.89  | 25.03   | 0.64 |
| MR1           | 207565_s_at  | 25.51  | 39.75   | 0.64 |
|               | 210223_s_at  | 40.05  | 58.74   | 0.68 |
| SF3B4         | 209044_x_at  | 106.54 | 165.24  | 0.64 |
| SNX1          | 201716_at    | 183.56 | 285.77  | 0.64 |
|               | 214531_s_at  | 105.55 | 156.2   | 0.68 |
| TAPBP         | 1555565_s_at | 111.44 | 175.1   | 0.64 |
|               | 208829_at    | 768.69 | 1133.72 | 0.68 |
| TMEM214       | 217899_at    | 79.8   | 125.56  | 0.64 |
| ADPGK         | 224455_s_at  | 288.23 | 440.24  | 0.65 |
| ARAF          | 201895_at    | 216.67 | 331.03  | 0.65 |
| ASPSCR1       | 218908_at    | 57.1   | 87.5    | 0.65 |
| ATAD2B        | 232908_at    | 40.81  | 62.87   | 0.65 |
| ATF7          | 228830_s_at  | 56.65  | 87.53   | 0.65 |
| ATP6V0C       | 36994_at     | 888.28 | 1358.69 | 0.65 |
| BSG           | 208677_s_at  | 63.6   | 97.15   | 0.65 |
| CIZ1          | 213977_s_at  | 53.97  | 83.64   | 0.65 |
|               | 211358_s_at  | 36.54  | 48.82   | 0.75 |
| ELMO2         | 220363_s_at  | 12.92  | 19.85   | 0.65 |
|               | 221528_s_at  | 120.87 | 171.46  | 0.7  |
| ERGIC3        | 216032_s_at  | 305.79 | 472.94  | 0.65 |
| FMNL1         | 204789_at    | 78.27  | 120.22  | 0.65 |
| GMIP          | 222782_s_at  | 31.88  | 48.72   | 0.65 |
|               | 218913_s_at  | 317.62 | 449.91  | 0.71 |
| HECTD3        | 218632_at    | 50.85  | 78.26   | 0.65 |
| INO80B        | 65133_i_at   | 12.2   | 18.69   | 0.65 |
| MEN1          | 202645_s_at  | 110.38 | 169.74  | 0.65 |
| <b>NOTCH2</b> | 210756_s_at  | 88.07  | 134.79  | 0.65 |
| PKN1          | 202161_at    | 83.7   | 129.24  | 0.65 |
| PNPLA6        | 203718_at    | 66.89  | 103.63  | 0.65 |
| PRKAB1        | 201835_s_at  | 49.42  | 76.42   | 0.65 |
| <b>PSEN1</b>  | 207782_s_at  | 45.2   | 69.17   | 0.65 |
| REC8          | 218599_at    | 132.4  | 203.81  | 0.65 |
| RHOG          | 203175_at    | 169.88 | 262.35  | 0.65 |
| SH3BGR13      | 221269_s_at  | 526.25 | 812.93  | 0.65 |
| SUOX          | 204067_at    | 25.09  | 38.48   | 0.65 |
| TCF3          | 209151_x_at  | 33.23  | 51.13   | 0.65 |
| TOLLIP        | 217930_s_at  | 68.41  | 104.75  | 0.65 |
| TRIM28        | 200990_at    | 164.43 | 253.7   | 0.65 |
| TRRAP         | 214908_s_at  | 84.25  | 129.33  | 0.65 |
| <b>APH1A</b>  | 1554417_s_at | 80.46  | 122.68  | 0.66 |
| CDK16         | 207239_s_at  | 19.42  | 29.27   | 0.66 |
| <b>NCOR2</b>  | 207760_s_at  | 449    | 679.21  | 0.66 |
| NUP62         | 207740_s_at  | 90.62  | 136.54  | 0.66 |
| PAK2          | 208876_s_at  | 24.41  | 37.25   | 0.66 |
| PCGF5         | 227935_s_at  | 283.67 | 426.82  | 0.66 |
| RNH1          | 206050_s_at  | 240.06 | 362.15  | 0.66 |
| SLC25A1       | 210010_s_at  | 75.58  | 114.76  | 0.66 |
| SLC25A39      | 223649_s_at  | 111.51 | 168.78  | 0.66 |
| YPEL3         | 223179_at    | 607.91 | 914.46  | 0.66 |
| ATG9A         | 202492_at    | 129.12 | 193.03  | 0.67 |
| BAT2          | 212081_x_at  | 131.9  | 196.21  | 0.67 |
|               | 208132_x_at  | 155.13 | 208.29  | 0.74 |
| CMIP          | 224991_at    | 40.45  | 59.95   | 0.67 |
| COPG          | 217749_at    | 217.65 | 325.19  | 0.67 |
| CSNK2A1       | 206075_s_at  | 73.69  | 109.9   | 0.67 |
|               | 212072_s_at  | 310.85 | 415.75  | 0.75 |
| GNB2          | 200852_x_at  | 237.4  | 356.96  | 0.67 |
| LGALS9        | 203236_s_at  | 83.73  | 125.54  | 0.67 |
| MAP2K3        | 207667_s_at  | 161.29 | 239.47  | 0.67 |
| MAP2K7        | 226053_at    | 67.38  | 100.22  | 0.67 |
| MRPL2         | 229884_s_at  | 41.97  | 62.29   | 0.67 |
| MRPL4         | 223743_s_at  | 42.62  | 63.96   | 0.67 |
|               | 218105_s_at  | 109.05 | 138.46  | 0.79 |
| OBFC2B        | 218903_s_at  | 18.02  | 26.95   | 0.67 |
| PDXP          | 223290_at    | 63.49  | 95.35   | 0.67 |
| PPP4C         | 208932_at    | 237.66 | 353.87  | 0.67 |
| RBM42         | 205740_s_at  | 91.01  | 136.11  | 0.67 |
| RELA          | 209878_s_at  | 127.48 | 190.7   | 0.67 |
|               | 201783_s_at  | 413.2  | 553.57  | 0.75 |
| SLC35A4       | 224626_at    | 99.29  | 148.48  | 0.67 |
| SRRM2         | 216629_at    | 20.49  | 30.56   | 0.67 |
| TMEM208       | 221597_s_at  | 226.99 | 338.96  | 0.67 |
| YIF1A         | 202418_at    | 104.58 | 155.05  | 0.67 |
| ZNF384        | 212369_at    | 141.45 | 210.06  | 0.67 |
| BCL7B         | 202518_at    | 160.88 | 237.33  | 0.68 |

|         |              |         |         |      |
|---------|--------------|---------|---------|------|
| CTBP1   | 203392_s_at  | 978.56  | 1438.52 | 0.68 |
| EFHD2   | 217992_s_at  | 265.63  | 392.6   | 0.68 |
| HSBP1   | 200942_s_at  | 220.57  | 325.3   | 0.68 |
| MLST8   | 220587_s_at  | 60.44   | 88.37   | 0.68 |
| MRPL38  | 225103_at    | 67.16   | 98.97   | 0.68 |
| P2RX4   | 204088_at    | 95.91   | 140.85  | 0.68 |
| SMARCD1 | 209518_at    | 139.65  | 204.26  | 0.68 |
| SPEN    | 1556058_s_at | 44.03   | 64.54   | 0.68 |
| SRM     | 201516_at    | 117.76  | 172.91  | 0.68 |
| ST6GAL1 | 214971_s_at  | 24.06   | 35.54   | 0.68 |
| TPP1    | 200743_s_at  | 710.55  | 1043.42 | 0.68 |
| UBE2M   | 203109_at    | 159.67  | 234.16  | 0.68 |
| UBE2N   | 201523_x_at  | 435.55  | 653.49  | 0.67 |
|         | 201524_x_at  | 1240.22 | 1648.75 | 0.75 |
| YKT6    | 217785_s_at  | 17.42   | 25.53   | 0.68 |
| ADI1    | 222400_s_at  | 452.29  | 653.49  | 0.69 |
| ARF1    | 208750_s_at  | 329.07  | 477.36  | 0.69 |
| ATP5J2  | 202961_s_at  | 592.03  | 860.14  | 0.69 |
| AXIN1   | 212849_at    | 103.95  | 151.36  | 0.69 |
| CD74    | 209619_at    | 5451.49 | 7917.39 | 0.69 |
| CHCHD5  | 223479_s_at  | 47.69   | 69.15   | 0.69 |
| FAM83H  | 226129_at    | 12.88   | 18.66   | 0.69 |
| N4BP2   | 228242_at    | 265.77  | 386.18  | 0.69 |
| NRBP1   | 217765_at    | 113.22  | 163.75  | 0.69 |
| PLD3    | 201050_at    | 40.28   | 58.31   | 0.69 |
| PRPF38A | 1553709_a_at | 167.77  | 243.74  | 0.69 |
| PTK2B   | 203111_s_at  | 36.66   | 53.51   | 0.69 |
| PTPN9   | 202958_at    | 40.14   | 58.27   | 0.69 |
| SENP2   | 218122_s_at  | 97.48   | 140.52  | 0.69 |
| TMEM115 | 216267_s_at  | 51.47   | 74.75   | 0.69 |
| TOM1    | 202807_s_at  | 59.42   | 86.71   | 0.69 |
| UCKL1   | 232675_s_at  | 74.84   | 109.06  | 0.69 |
| WDR48   | 222157_s_at  | 89.97   | 130.68  | 0.69 |
| XPO5    | 223057_s_at  | 48.09   | 69.68   | 0.69 |
| ACO2    | 200793_s_at  | 197.14  | 282.46  | 0.7  |
| AKT1    | 207163_s_at  | 124.65  | 177.84  | 0.7  |
| AP3M2   | 203410_at    | 102.53  | 146.09  | 0.7  |
| CACNB2  | 1555098_a_at | 15.75   | 22.64   | 0.7  |
| CARKD   | 217940_s_at  | 390.29  | 559.56  | 0.7  |
| CCDC124 | 225454_at    | 80.5    | 114.2   | 0.7  |
| CTSD    | 200766_at    | 25.24   | 36.26   | 0.7  |
| DEAF1   | 209407_s_at  | 37.18   | 52.94   | 0.7  |
| FBXW11  | 209456_s_at  | 15.64   | 22.35   | 0.7  |
| HLA-J   | 217436_x_at  | 812.12  | 1159.07 | 0.7  |
| MED12   | 203506_s_at  | 56.15   | 80.59   | 0.7  |
| MXD4    | 212347_x_at  | 73.24   | 103.89  | 0.7  |
|         | 212346_s_at  | 76.1    | 98.56   | 0.77 |
| NUDT3   | 221579_s_at  | 153.87  | 220.64  | 0.7  |
| PACS1   | 224658_x_at  | 105.22  | 149.82  | 0.7  |
| PI4KB   | 210417_s_at  | 93.03   | 133.84  | 0.7  |
| SCAMP4  | 213244_at    | 79.58   | 113.22  | 0.7  |
| SRRT    | 222046_at    | 57.06   | 81.25   | 0.7  |
| SS18    | 209954_x_at  | 50.82   | 73.11   | 0.7  |
| STAT2   | 205170_at    | 54.62   | 77.72   | 0.7  |
| TMEM127 | 222887_s_at  | 83.22   | 118.16  | 0.7  |
| TUSC2   | 203272_s_at  | 121.37  | 174.19  | 0.7  |
|         | 203273_s_at  | 117.15  | 166.85  | 0.7  |
| TYK2    | 205546_s_at  | 342.03  | 486.5   | 0.7  |
| UBE4B   | 202316_x_at  | 38.63   | 55.37   | 0.7  |
|         | 215533_s_at  | 45.3    | 63.7    | 0.71 |
| YIPF3   | 216338_s_at  | 103.36  | 147.39  | 0.7  |
| ARFGAP2 | 211975_at    | 280.5   | 394.21  | 0.71 |
|         | 227057_at    | 17.72   | 26.62   | 0.67 |
| ARPC4   | 217817_at    | 332.6   | 468.4   | 0.71 |
| ATP5B   | 201322_at    | 1265.46 | 1785.4  | 0.71 |
| ATP6V1F | 201527_at    | 573.51  | 802.36  | 0.71 |
| CBX5    | 212126_at    | 187.78  | 265.44  | 0.71 |
| CLTB    | 206284_x_at  | 78.87   | 111.65  | 0.71 |
|         | 205172_x_at  | 74.7    | 94.77   | 0.79 |
|         | 211043_s_at  | 132.07  | 167.6   | 0.79 |
| CNPY3   | 217931_at    | 329.17  | 465.83  | 0.71 |
| COPS7A  | 209029_at    | 76.68   | 108.22  | 0.71 |
| CORO7   | 219040_at    | 103.71  | 147.1   | 0.71 |
| DAXX    | 201763_s_at  | 136.31  | 191.4   | 0.71 |
| DPP3    | 218567_x_at  | 61.76   | 87.47   | 0.71 |
|         | 232510_s_at  | 171.09  | 237.06  | 0.72 |
| EHBP1L1 | 221755_at    | 178.61  | 252.26  | 0.71 |

|             |              |         |         |      |
|-------------|--------------|---------|---------|------|
|             | 91703_at     | 134.5   | 178.53  | 0.75 |
|             | 1557228_at   | 121.68  | 157.56  | 0.77 |
| ELMO1       | 204513_s_at  | 113.54  | 159.16  | 0.71 |
| FGD2        | 1559091_s_at | 59.86   | 83.93   | 0.71 |
| GABARAPL2   | 209046_s_at  | 1381.64 | 1939.66 | 0.71 |
| HLA-C       | 211799_x_at  | 1723.51 | 2429.1  | 0.71 |
|             | 214459_x_at  | 7637.63 | 9321.63 | 0.82 |
| HLA-G       | 210514_x_at  | 1100.72 | 1548.41 | 0.71 |
|             | 211529_x_at  | 4128.35 | 5806.05 | 0.71 |
|             | 211528_x_at  | 4988.82 | 6509.67 | 0.77 |
| LETM1       | 222006_at    | 132.77  | 186.85  | 0.71 |
| LRRC6       | 206483_at    | 15.62   | 21.98   | 0.71 |
| NADK        | 213607_x_at  | 62.62   | 88.78   | 0.71 |
| NONO        | 210470_x_at  | 348.76  | 492.91  | 0.71 |
|             | 208698_s_at  | 229     | 320.2   | 0.72 |
| OTUB1       | 201245_s_at  | 276.26  | 387.29  | 0.71 |
| PARP9       | 227807_at    | 96.37   | 136.44  | 0.71 |
| PDCL        | 204448_s_at  | 49.67   | 69.86   | 0.71 |
| PIGG        | 1563842_at   | 57.1    | 80.98   | 0.71 |
| PRELID1     | 223032_x_at  | 472.42  | 662.34  | 0.71 |
| RNF10       | 207801_s_at  | 446.08  | 626.47  | 0.71 |
| SAP30L      | 239802_at    | 29.12   | 40.94   | 0.71 |
| SFRS17A     | 210269_s_at  | 145.85  | 206     | 0.71 |
| SNRPB       | 213175_s_at  | 1028.1  | 1456.83 | 0.71 |
|             | 208821_at    | 749.76  | 966.47  | 0.78 |
| SRA1        | 224130_s_at  | 161.66  | 227.02  | 0.71 |
| SUDS3       | 233841_s_at  | 251.8   | 352.81  | 0.71 |
| THBS3       | 209561_at    | 62.87   | 88.5    | 0.71 |
| TM9SF4      | 212198_s_at  | 97.07   | 137.18  | 0.71 |
|             | 212194_s_at  | 59.02   | 76.9    | 0.77 |
| TSC2        | 215735_s_at  | 77.72   | 109.72  | 0.71 |
| UBXN6       | 220757_s_at  | 83.85   | 118.37  | 0.71 |
| WDR45       | 209217_s_at  | 111.47  | 156.47  | 0.71 |
|             | 209216_at    | 336.14  | 439.24  | 0.77 |
| ACIN1       | 201715_s_at  | 239.23  | 332.59  | 0.72 |
| ACTN4       | 200601_at    | 67.58   | 93.9    | 0.72 |
| ALDOA       | 214687_x_at  | 1213.45 | 1679.09 | 0.72 |
|             | 200966_x_at  | 1160.39 | 1614.23 | 0.72 |
|             | 238996_x_at  | 101.94  | 140.73  | 0.72 |
| AMDHD2      | 219082_at    | 64.57   | 89.08   | 0.72 |
| ARL8A       | 225347_at    | 113.78  | 157.22  | 0.72 |
| ASB8        | 218841_at    | 90.31   | 125.51  | 0.72 |
| CDC37       | 209953_s_at  | 415.53  | 573.66  | 0.72 |
| COX6B1      | 201441_at    | 925.22  | 1280.22 | 0.72 |
| CSNK2B      | 201390_s_at  | 519.02  | 725.32  | 0.72 |
| DCTN3       | 204246_s_at  | 273.71  | 381.64  | 0.72 |
| <b>DVL3</b> | 201908_at    | 217.93  | 304.09  | 0.72 |
| EIF6        | 210213_s_at  | 236.86  | 330.34  | 0.72 |
| ERAP1       | 210385_s_at  | 19.67   | 27.36   | 0.72 |
| GOLGB1      | 201056_at    | 94.46   | 131.86  | 0.72 |
| ITGB5       | 201124_at    | 9.36    | 13.08   | 0.72 |
| NDUFA13     | 220864_s_at  | 681.87  | 946.66  | 0.72 |
| NKIRAS2     | 218240_at    | 106.24  | 146.72  | 0.72 |
|             | 222105_s_at  | 70.3    | 91.41   | 0.77 |
| PRKCA       | 215195_at    | 19.22   | 26.74   | 0.72 |
| PSPC1       | 226574_at    | 261.37  | 364.41  | 0.72 |
| RAB4B       | 233385_x_at  | 157.45  | 219.02  | 0.72 |
| RABEP2      | 77508_r_at   | 102.92  | 142.07  | 0.72 |
| SF3A1       | 201357_s_at  | 110.09  | 153.17  | 0.72 |
| SLC43A3     | 210692_s_at  | 11.1    | 15.43   | 0.72 |
| STAG3L4     | 222801_s_at  | 158.58  | 221.03  | 0.72 |
| TAF10       | 200055_at    | 865.97  | 1204.4  | 0.72 |
| TBCB        | 216194_s_at  | 563.1   | 782.59  | 0.72 |
|             | 201804_x_at  | 580.3   | 794.65  | 0.73 |
| TUFM        | 201113_at    | 585.35  | 808.91  | 0.72 |
| ZDHHC5      | 224868_at    | 31.57   | 43.64   | 0.72 |
| COMT        | 208817_at    | 60.89   | 83.69   | 0.73 |
| CORO1B      | 221754_s_at  | 56.91   | 77.9    | 0.73 |
| CTAGE9      | 215549_x_at  | 59.05   | 80.97   | 0.73 |
| DNM2        | 202253_s_at  | 148.21  | 202.41  | 0.73 |
| ERAL1       | 212087_s_at  | 47.52   | 64.77   | 0.73 |
| FAM134A     | 218037_at    | 217.61  | 299.64  | 0.73 |
| FLOT1       | 208749_x_at  | 267.87  | 366.64  | 0.73 |
| GLE1        | 206920_s_at  | 56.12   | 77.27   | 0.73 |
| HPS1        | 217354_s_at  | 57.87   | 78.96   | 0.73 |
| L3MBTL2     | 1555815_a_at | 46.09   | 63.32   | 0.73 |
| MAN2B1      | 209166_s_at  | 305.91  | 418.91  | 0.73 |

|              |              |          |          |      |
|--------------|--------------|----------|----------|------|
| MICALL1      | 221779_at    | 168.16   | 229.55   | 0.73 |
|              | 55081_at     | 149.59   | 203.97   | 0.73 |
| MLX          | 217909_s_at  | 93.33    | 127.99   | 0.73 |
| MYO9B        | 217297_s_at  | 188.26   | 259.12   | 0.73 |
| NCOA5        | 234471_s_at  | 49.96    | 68.01    | 0.73 |
| PGLS         | 218388_at    | 326.05   | 446.18   | 0.73 |
| POTEKP       | 210926_at    | 20.05    | 27.59    | 0.73 |
| PSMC4        | 201252_at    | 273.46   | 374.48   | 0.73 |
| SUPT6H       | 208830_s_at  | 62.74    | 85.9     | 0.73 |
| TBC1D5       | 201815_s_at  | 79.7     | 109.75   | 0.73 |
| TMEM87A      | 212204_at    | 599.48   | 816.99   | 0.73 |
| AAAS         | 218075_at    | 70.86    | 95.85    | 0.74 |
| ADRM1        | 201281_at    | 228.54   | 308.96   | 0.74 |
| API5         | 201686_x_at  | 47.15    | 63.53    | 0.74 |
| ASCC2        | 215684_s_at  | 112.28   | 152.69   | 0.74 |
| ATP5G3       | 207507_s_at  | 829.58   | 1122.39  | 0.74 |
| BAT3         | 213318_s_at  | 517.11   | 699.08   | 0.74 |
|              | 201255_x_at  | 582.86   | 746.18   | 0.78 |
|              | 210208_x_at  | 639.42   | 805.77   | 0.79 |
| CHCHD1       | 226896_at    | 296.63   | 400.86   | 0.74 |
| CIAPIN1      | 208968_s_at  | 256.25   | 348.03   | 0.74 |
| COPA         | 208684_at    | 445.16   | 601.46   | 0.74 |
| CYC1         | 201066_at    | 281.24   | 379.35   | 0.74 |
| DMWD         | 33768_at     | 104.63   | 140.54   | 0.74 |
|              | 1554429_a_at | 44.17    | 58.91    | 0.75 |
| GPI          | 208308_s_at  | 290.63   | 390.73   | 0.74 |
| HEXA         | 201765_s_at  | 297.52   | 402.91   | 0.74 |
| HLA-F        | 204806_x_at  | 2439.5   | 3277.05  | 0.74 |
|              | 221875_x_at  | 3680.15  | 4820.98  | 0.76 |
| MPHOSPH9     | 237158_s_at  | 20.8     | 27.95    | 0.74 |
| NAT14        | 223284_at    | 35.45    | 47.66    | 0.74 |
| <b>NCSTN</b> | 208759_at    | 112.28   | 151.78   | 0.74 |
| PDK2         | 202590_s_at  | 53.81    | 72.95    | 0.74 |
| PHB2         | 201600_at    | 1659.23  | 2232.17  | 0.74 |
| PITPNM1      | 203826_s_at  | 114.37   | 153.55   | 0.74 |
| POLDIP2      | 217806_s_at  | 156.74   | 211.33   | 0.74 |
|              | 222425_s_at  | 83.98    | 101.04   | 0.83 |
| POLE3        | 208828_at    | 386.66   | 524.25   | 0.74 |
| POLR2D       | 214144_at    | 26.2     | 35.29    | 0.74 |
| PSMC3        | 201267_s_at  | 202.93   | 273.61   | 0.74 |
| RAN          | 200750_s_at  | 1767.89  | 2402.76  | 0.74 |
| VAMP3        | 211749_s_at  | 177.18   | 238.17   | 0.74 |
| ALKBH5       | 1553101_a_at | 201.05   | 267.61   | 0.75 |
| AP3M1        | 222516_at    | 224.02   | 299.93   | 0.75 |
| CHFR         | 223931_s_at  | 249.57   | 333.17   | 0.75 |
|              |              |          |          |      |
| GART         | 210005_at    | 30.06    | 39.95    | 0.75 |
| GFM1         | 225161_at    | 95.58    | 127.89   | 0.75 |
| GTF2F1       | 202356_s_at  | 105.34   | 140.73   | 0.75 |
| HLA-B        | 208729_x_at  | 6829.14  | 9080.46  | 0.75 |
|              | 211911_x_at  | 9645.62  | 12697.18 | 0.76 |
|              | 209140_x_at  | 11756.25 | 13756.08 | 0.85 |
| INO80D       | 227924_at    | 72.35    | 96.56    | 0.75 |
| LINS1        | 231976_at    | 49.56    | 65.66    | 0.75 |
| LRSAM1       | 227675_at    | 42.99    | 57.58    | 0.75 |
| MBD4         | 214048_at    | 556.53   | 746.26   | 0.75 |
| MYO1C        | 32811_at     | 118.23   | 156.76   | 0.75 |
| QKI          | 214543_x_at  | 135.82   | 180.54   | 0.75 |
| RAB1B        | 220964_s_at  | 232.54   | 309.5    | 0.75 |
| RAB2B        | 225074_at    | 411.71   | 549.94   | 0.75 |
|              |              |          |          |      |
| STK24        | 208854_s_at  | 463.11   | 620.53   | 0.75 |
| TLR9         | 223903_at    | 44.76    | 59.49    | 0.75 |
| TMEM138      | 223113_at    | 364.83   | 487      | 0.75 |
| TMEM199      | 225375_at    | 90.88    | 120.81   | 0.75 |
| TTYH3        | 224674_at    | 67.5     | 89.98    | 0.75 |
| TYMP         | 204858_s_at  | 55.92    | 74.1     | 0.75 |
| ZNF207       | 200828_s_at  | 957.2    | 1276.6   | 0.75 |
| AP2A1        | 234068_s_at  | 11.04    | 14.43    | 0.76 |
| ARPC2        | 208679_s_at  | 2978.61  | 3917.51  | 0.76 |
| CPSF7        | 217866_at    | 389.49   | 510.59   | 0.76 |
| CRIPAK       | 241408_at    | 113.25   | 149.69   | 0.76 |
| DGKZ         | 207556_s_at  | 70.7     | 93.38    | 0.76 |
|              | 239342_at    | 18.53    | 23.31    | 0.79 |
| EFTUD2       | 222398_s_at  | 523.61   | 691.75   | 0.76 |
| GHITM        | 1554510_s_at | 308.28   | 407.38   | 0.76 |
| HIGD2A       | 209329_x_at  | 863.83   | 1138.19  | 0.76 |

|          |              |         |          |      |
|----------|--------------|---------|----------|------|
| KLHDC3   | 208784_s_at  | 50.4    | 66.71    | 0.76 |
| MAPK9    | 210570_x_at  | 100.26  | 131.83   | 0.76 |
| MAZ      | 212064_x_at  | 84.19   | 110.39   | 0.76 |
| NFX1     | 202585_s_at  | 80.04   | 105.98   | 0.76 |
| PIGT     | 217770_at    | 176.16  | 231.31   | 0.76 |
| PPP2R4   | 208874_x_at  | 49.65   | 65.07    | 0.76 |
| PSMB7    | 200786_at    | 618.69  | 815.34   | 0.76 |
| RCAN1    | 215253_s_at  | 16.51   | 21.58    | 0.76 |
| RNF40    | 206845_s_at  | 91.02   | 119.21   | 0.76 |
| STK11    | 41657_at     | 108.7   | 143.5    | 0.76 |
| STXBP2   | 209367_at    | 91.95   | 121.06   | 0.76 |
| TET3     | 214754_at    | 47.14   | 61.97    | 0.76 |
| TP53     | 211300_s_at  | 17.51   | 22.9     | 0.76 |
| ZFAND3   | 218020_s_at  | 152.04  | 199.76   | 0.76 |
| ZMAT2    | 224782_at    | 480.56  | 632.22   | 0.76 |
| AP2A2    | 211779_x_at  | 200.23  | 260.06   | 0.77 |
|          | 212159_x_at  | 197.41  | 250.46   | 0.79 |
| ASB6     | 221657_s_at  | 81.36   | 105.14   | 0.77 |
| CHRNA1   | 206703_at    | 15.91   | 20.58    | 0.77 |
| FKBP9    | 212169_at    | 20.8    | 27.1     | 0.77 |
| GSS      | 211630_s_at  | 70.87   | 92.51    | 0.77 |
| HCFC1R1  | 45714_at     | 57.03   | 74.26    | 0.77 |
| MED24    | 213043_s_at  | 110.27  | 142.72   | 0.77 |
| PACSIN2  | 1554691_a_at | 37.64   | 48.65    | 0.77 |
| PITPNM2  | 1552923_a_at | 16.27   | 21.12    | 0.77 |
| PPM1G    | 200913_at    | 209.09  | 270.51   | 0.77 |
| RNF181   | 223064_at    | 419.52  | 541.71   | 0.77 |
| SEPHS1   | 208941_s_at  | 106.16  | 137.97   | 0.77 |
| SH3GLB1  | 209091_s_at  | 467.6   | 605.71   | 0.77 |
| TBC1D9B  | 212054_x_at  | 201.07  | 261.79   | 0.77 |
|          | 215994_x_at  | 252.77  | 313.03   | 0.81 |
| VPS39    | 212156_at    | 247.7   | 322.88   | 0.77 |
| ANKFY1   | 219868_s_at  | 32.56   | 41.64    | 0.78 |
| CINP     | 218267_at    | 42.18   | 54.12    | 0.78 |
| CLK4     | 1568836_at   | 10.21   | 13.12    | 0.78 |
| GTDC1    | 238585_at    | 28.98   | 37.38    | 0.78 |
| MINK1    | 215909_x_at  | 45.28   | 58.32    | 0.78 |
| MRPL10   | 224671_at    | 242.34  | 310.13   | 0.78 |
| MRPL37   | 222993_at    | 137.38  | 176.55   | 0.78 |
| MT1X     | 208581_x_at  | 107.4   | 137.44   | 0.78 |
| NOL6     | 218199_s_at  | 53.3    | 68.28    | 0.78 |
| PDE7B    | 220343_at    | 13.52   | 17.36    | 0.78 |
| PFDN6    | 222019_at    | 15.77   | 20.33    | 0.78 |
| POLR2C   | 208996_s_at  | 214.06  | 274.54   | 0.78 |
| RBM5     | 201394_s_at  | 627.69  | 802.62   | 0.78 |
| RNF220   | 219988_s_at  | 213.33  | 271.96   | 0.78 |
| SFRS9    | 201698_s_at  | 1050.28 | 1349.47  | 0.78 |
| SHC1     | 201469_s_at  | 32.48   | 41.81    | 0.78 |
|          | 214853_s_at  | 542.8   | 690.11   | 0.79 |
| TBC1D10B | 220947_s_at  | 95.85   | 122.5    | 0.78 |
| TCEB2    | 200085_s_at  | 1005.06 | 1289.11  | 0.78 |
| AGBL5    | 218480_at    | 38.74   | 49.32    | 0.79 |
| BCL7C    | 219072_at    | 174.02  | 219.67   | 0.79 |
| BECN1    | 208946_s_at  | 472.34  | 597.93   | 0.79 |
| CHMP1A   | 201933_at    | 198.38  | 251.16   | 0.79 |
| DAP      | 201095_at    | 173.1   | 220.08   | 0.79 |
| INPP5K   | 202781_s_at  | 91.76   | 116.3    | 0.79 |
| MAP4     | 200836_s_at  | 74.17   | 93.96    | 0.79 |
| PES1     | 202212_at    | 108.04  | 137.19   | 0.79 |
| PRR13    | 217794_at    | 966.55  | 1216.61  | 0.79 |
| SART1    | 200051_at    | 240.29  | 302.84   | 0.79 |
| SSBP4    | 229270_x_at  | 78.84   | 99.24    | 0.79 |
| URM1     | 208101_s_at  | 78.7    | 99.91    | 0.79 |
| USF2     | 202152_x_at  | 290.56  | 369.05   | 0.79 |
| WIZ      | 52005_at     | 60.9    | 77.4     | 0.79 |
| YWHAZ    | 200640_at    | 3434.94 | 4364.69  | 0.79 |
|          | 200638_s_at  | 3561.13 | 4430.95  | 0.8  |
| DAPK3    | 203890_s_at  | 8.93    | 11.12    | 0.8  |
| DNAJC4   | 223371_s_at  | 36.28   | 45.49    | 0.8  |
| EWSR1    | 210011_s_at  | 431.66  | 537.19   | 0.8  |
| GUK1     | 200075_s_at  | 362.7   | 452.46   | 0.8  |
| HDGF     | 200896_x_at  | 339.31  | 425.41   | 0.8  |
| HLA-A    | 215313_x_at  | 8696.31 | 10850.22 | 0.8  |
|          | 213932_x_at  | 8315.98 | 10246.72 | 0.81 |
| HMGXB3   | 212431_at    | 155.42  | 195.46   | 0.8  |
| LSM12    | 212532_s_at  | 190.07  | 237.95   | 0.8  |
| MBD1     | 208595_s_at  | 97.66   | 121.51   | 0.8  |

|          |             |         |         |      |
|----------|-------------|---------|---------|------|
| PIAS2    | 1555513_at  | 6.77    | 8.48    | 0.8  |
| RAB11B   | 217793_at   | 42.16   | 53      | 0.8  |
|          | 34478_at    | 9.75    | 12.04   | 0.81 |
| SAPS2    | 202791_s_at | 115.44  | 144.58  | 0.8  |
| SH3BP1   | 213633_at   | 82.43   | 102.99  | 0.8  |
| CASP2    | 34449_at    | 23.12   | 28.64   | 0.81 |
| HDAC3    | 216326_s_at | 293.08  | 361.55  | 0.81 |
| NFAT5    | 224984_at   | 1080.49 | 1338.21 | 0.81 |
| BRMS1    | 215631_s_at | 188.22  | 229.62  | 0.82 |
| DDX49    | 31807_at    | 189.04  | 231.57  | 0.82 |
| DNAJB12  | 202865_at   | 10.15   | 12.35   | 0.82 |
| GTF3C5   | 217876_at   | 32.9    | 40.36   | 0.82 |
| HSF1     | 213756_s_at | 23.7    | 29.07   | 0.82 |
| LYPLA2   | 202292_x_at | 217.71  | 264.85  | 0.82 |
| SLC25A46 | 212833_at   | 441.71  | 540.71  | 0.82 |
| SMC1A    | 239688_at   | 16.17   | 19.83   | 0.82 |
| TNPO2    | 226428_at   | 119.3   | 145.6   | 0.82 |
| MT1P2    | 211456_x_at | 155.51  | 187.28  | 0.83 |
| UCK1     | 223142_s_at | 37.74   | 45.71   | 0.83 |
| VPS4A    | 217913_at   | 280.77  | 338.33  | 0.83 |
| VPS33A   | 204590_x_at | 36.98   | 44.25   | 0.84 |
| PHF17    | 218517_at   | 345.51  | 250.37  | 1.38 |
|          | 225816_at   | 337.11  | 216.98  | 1.55 |
| PTPDC1   | 238841_at   | 21.9    | 14.81   | 1.48 |
| EPM2AIP1 | 202909_at   | 1076.63 | 710.97  | 1.51 |
| PLEKHF2  | 218640_s_at | 1225.11 | 745.75  | 1.64 |
| ZNF83    | 236429_at   | 36.03   | 21      | 1.72 |
| MUDENG   | 232156_at   | 127.26  | 73.62   | 1.73 |
| FARSB    | 232063_x_at | 29.79   | 16.65   | 1.79 |
| PMAIP1   | 204285_s_at | 4922.05 | 2739.24 | 1.8  |
| FAM115A  | 212979_s_at | 38.42   | 21.05   | 1.83 |
| NFATC3   | 210556_at   | 110.43  | 59.75   | 1.85 |
| KLF2     | 219371_s_at | 2013.43 | 1046.35 | 1.92 |
| ZNF844   | 228346_at   | 241.51  | 125.51  | 1.92 |
| ZNF652   | 205594_at   | 359.47  | 182.32  | 1.97 |
| LRRC37A2 | 221740_x_at | 150.13  | 73.85   | 2.03 |
| RUFY2    | 241996_at   | 170.73  | 82.94   | 2.06 |
| MALAT1   | 227510_x_at | 51.72   | 24.86   | 2.08 |
|          | 223940_x_at | 1557.89 | 403.1   | 3.86 |
|          | 224568_x_at | 1050.4  | 271.31  | 3.87 |
| HELLS    | 220085_at   | 84.46   | 36.08   | 2.34 |
| FBXL3    | 242829_x_at | 411.56  | 173.34  | 2.37 |
| HNRPLL   | 225386_s_at | 101.36  | 39.59   | 2.56 |
| ARRDC3   | 224797_at   | 634.01  | 219.77  | 2.88 |

Genes from the NOTCH1 pathway are shown in bold.

**Supplementary Table 10.** Clinical and biological features of the 363 CLL patients included in the validation study

| Parameter                                       | Category       | Cases (%)     |
|-------------------------------------------------|----------------|---------------|
| Gender                                          | Male           | 223 (61%)     |
| Age (years), median (range)                     |                | 63 (27-94)    |
| Binet stage                                     | A              | 286 (79%)     |
|                                                 | B              | 54 (15%)      |
|                                                 | C              | 23 ( 6%)      |
| Rai stage                                       | 0              | 190 (52%)     |
|                                                 | I-II           | 142 (39%)     |
|                                                 | III-IV         | 31 ( 9%)      |
| Lymphocytes ( $\times 10^9/L$ ), median (range) |                | 45 (1.2-410)  |
| Haemoglobin (g/L), median (range)               |                | 141 (46-168)  |
| Platelets ( $\times 10^9/L$ ), median (range)   |                | 189 (21-470)  |
| LDH                                             | >UNL           | 46/335 (14%)  |
| $\beta_2$ -microglobulin (mg/L)                 | >UNL           | 81/294 (28%)  |
| Lymphocyte doubling time                        | < 1 year       | 65/177 (37%)  |
| CD38                                            | High           | 68/225 (30%)  |
| ZAP-70                                          | High           | 103/289 (36%) |
| IGHV                                            | Unmutated      | 134/255 (53%) |
| Genetic abnormality                             | del(13)(q14.3) | 99/236 (42%)  |
|                                                 | del(11)(q22.3) | 35/228 (15%)  |
|                                                 | +12            | 39/246 (16%)  |
|                                                 | del(17)(p13.1) | 13/236 (6%)   |
| 10-year time TTP (95% CI)                       | Binet stage A  | 50% (43-57)   |
| 10-year time to Richter (95% CI)                | All            | 5 % (2-8)     |
| 10-year OS (95% CI)                             | All            | 55 % (48-62)  |
| Follow-up (years), median (range)               |                | 7.4 (0.1-23)  |

CD38 high: >30% of positive CLL cells; ZAP-70 high:  $\geq$  20% of positive CLL cells; IGHV unmutated:  $\geq$  98% homology with germline; TTP: time to progression; OS: overall survival







|      |                   |                          |      |                             |                            |
|------|-------------------|--------------------------|------|-----------------------------|----------------------------|
| CV_C | PIK3R2_E12        | chr19:18277845+18278216  | 372  | CTGAGGTAGGAGGGTCACCTG       | GCCACTTGGTGGAGAGAGAG       |
| CV_C | PIK3R2_E13/14/15  | chr19:18279235+18280213  | 979  | GCTCAGCACCCACACAAC          | AGAAATGAGGACCCCTGGAT       |
| CV_C | GPCPD1_E1         | chr20:5584861+5585290    | 430  | AAGCACATTTCTGCTGTCAGG       | TTTCACTTGTTTCTTTCCCGC      |
| CV_C | GPCPD1_E2         | chr20:5579165+5579614    | 450  | GGTTGAGAGGCAGGGATTAAC       | ACCTGGGCCAAACCTATATC       |
| CV_C | GPCPD1_E3         | chr20:5573854+5574283    | 430  | GAGTTCTATTCCTTATTTGACCAAAGC | TGCTACCCACACAGCAAAGG       |
| CV_C | GPCPD1_E4         | chr20:5566764+5567078    | 315  | AATCCCACTAAGCCATTGTGC       | GTGATCTGGTACATTCCAGGC      |
| CV_C | GPCPD1_E5         | chr20:5564782+5565109    | 328  | CACGTGTGGCCTGTCTTTG         | AAATATGCTTATTCACCTTGGG     |
| CV_C | GPCPD1_E6         | chr20:5560481+5560966    | 486  | CAACAGTAGCAATCTGAGCGG       | ATGAACAACGGTTTAGGCAGG      |
| CV_C | GPCPD1_E7         | chr20:5558804+5559370    | 567  | CTGGTCTTGATTGGAAACATCA      | TTCGAAGATTTAGCATATTTGGG    |
| CV_C | GPCPD1_E8/9       | chr20:5555980+5556808    | 829  | CCTTTGCTGAGAAAACAGTG        | AGACGTGAGCCACTGACCC        |
| CV_C | GPCPD1_E10        | chr20:5554421+5554844    | 424  | GTGTTGGCCATGTCGGTATTC       | TGTCTTCATCCGATCTTCACC      |
| CV_C | GPCPD1_E11        | chr20:5550658+5550960    | 303  | GGACTGGCAGTAATTCACCAAG      | TTTCTTACGTTCTTGCAGTTTGAG   |
| CV_C | GPCPD1_E12        | chr20:5547970+5548410    | 441  | CAGAACCCTTCTCCCAAACAG       | AATATAAGGGCTGGGAGGTGG      |
| CV_C | GPCPD1_E13        | chr20:5547222+5547432    | 211  | AATGCAAATTCATTTCCGAAC       | TGTGTGCTTTCTAGCTCACTCA     |
| CV_C | GPCPD1_E14        | chr20:5545635+5545860    | 226  | CTTGCCCTTGGTTTCTCCAA        | TACTTATGCTCTCGCGTTG        |
| CV_C | GPCPD1_E15        | chr20:5541965+5542354    | 390  | AGGGTCCAATAAGCATTGTGC       | CATCTACCAGGTTGTCACTTTGAG   |
| CV_C | GPCPD1_E16        | chr20:5540514+5540936    | 423  | CACCTCCAGACTGCTGCC          | CTCTATGCTGAATTATGACCTGTGTC |
| CV_C | GPCPD1_E17        | chr20:5539202+5539648    | 447  | GAGCCACTTGGTTTGTACAGTT      | TTGAACCTATGACCCGAAGT       |
| CV_C | GPCPD1_E18        | chr20:5538453+5538849    | 397  | ACCCACAGGCAAATGTCAAG        | CGCCTGCTGTACTTTGGAGAG      |
| CV_C | GPCPD1_E19        | chr20:5528221+5528573    | 353  | GGCATAGATCAACAATGCTCAG      | AAAGGTTGAGTCAGGCAGGTC      |
| CV_C | ACER2_E1          | chr9:19408885+19409280   | 396  | TCTGCGAACGAGTAACCTCC        | AGAGACCCACGCTCCAGCTTC      |
| CV_C | ACER2_E2          | chr9:19423765+19424152   | 388  | TGCCAACTTTGTTATCAAGCC       | TCCCGATTTGCAAGGACATAC      |
| CV_C | ACER2_E3          | chr9:19424542+19424938   | 397  | TGGGTGGTGTGAGTTTCTTTC       | AGGCTGAGTTCAATCATGTGC      |
| CV_C | ACER2_E4          | chr9:19434858+19435163   | 306  | GCAATGCCTGTACCTTGCTAAC      | TACAGGACAGCAAAGAAGCCC      |
| CV_C | ACER2_E5          | chr9:19446132+19446497   | 366  | TGTGGAGTGACTGTGTGTTGG       | ACCAC TTGCAGGGTGAACAG      |
| CV_C | ACER2_E6          | chr9:19450375+19450707   | 333  | AAGGAGCAGGCTAAACTCAGG       | TGGCTGTCTTCTTAGCAAAGG      |
| CV_C | XPO1_E12/13/14/15 | chr2:61719087+61720305   | 1219 | TTGCCCTCCTATTTCCATTG        | CCTACACATGGCTGGCTTG        |
| CV_C | GJA10             | chr6:90605515+90606001   | 487  | TGCACAGTGACTCAGGAAGC        | TCCCTCCTTTGCTCACTCAT       |
| CV_C | EFR3A             | chr8:132989282+132989540 | 259  | TTTTAGGGATTTGGGAACCA        | TGAAGATCAAAGACAGTGACAGAA   |
